# Supplementary material for: Cohort profile: the Dutch famine birth cohort (DFBC)— a prospective birth cohort study in the Netherlands
Source: PubMed Central journal article supplement (PMC7934722; doi:10.1136/bmjopen-2020-042078), 2021-03-04
Supplement: bmjopen-2020-042078.draft_revisions.pdf [file bmjopen-2020-042078.draft_revisions.pdf]

# BMJ Open

BMJ Open is committed to open peer review. As part of this commitment we make the peer review history of every article we publish publicly available.

When an article is published we post the peer reviewers' comments and the authors' responses online. We also post the versions of the paper that were used during peer review. These are the versions that the peer review comments apply to.

The versions of the paper that follow are the versions that were submitted during the peer review process. They are not the versions of record or the final published versions. They should not be cited or distributed as the published version of this manuscript.

BMJ Open is an open access journal and the full, final, typeset and author-corrected version of record of the manuscript is available on our site with no access controls, subscription charges or pay-per-view fees (<http://bmjopen.bmj.com>).

If you have any questions on BMJ Open's open peer review process please email [info.bmjopen@bmj.com](mailto:info.bmjopen@bmj.com)

# BMJ Open

## Cohort Profile: The Dutch famine birth cohort (DFBC), a prospective birth cohort study in the Netherlands

|                               |                                                                                                                                                                                                                                                                                                                                                                                                                                 |
|-------------------------------|---------------------------------------------------------------------------------------------------------------------------------------------------------------------------------------------------------------------------------------------------------------------------------------------------------------------------------------------------------------------------------------------------------------------------------|
| Journal:                      | <i>BMJ Open</i>                                                                                                                                                                                                                                                                                                                                                                                                                 |
| Manuscript ID                 | bmjopen-2020-042078                                                                                                                                                                                                                                                                                                                                                                                                             |
| Article Type:                 | Cohort profile                                                                                                                                                                                                                                                                                                                                                                                                                  |
| Date Submitted by the Author: | 24-Jun-2020                                                                                                                                                                                                                                                                                                                                                                                                                     |
| Complete List of Authors:     | Bleker, Laura ; Amsterdam UMC Location AMC, Epidemiology and Data Science<br>de Rooij, Susanne; Amsterdam UMC Location AMC, Epidemiology and Data Science<br>Painter, Rebecca; Amsterdam UMC Location AMC, Obstetrics & Gynaecology<br>Ravelli, Anita C.J.; Amsterdam UMC Location AMC, Medical Informatics<br>Roseboom, Tessa; Amsterdam UMC Location AMC, Clinical Epidemiology and Biostatistics; Obstetrics and Gynaecology |
| Keywords:                     | EPIDEMIOLOGY, NUTRITION & DIETETICS, PUBLIC HEALTH                                                                                                                                                                                                                                                                                                                                                                              |
|                               |                                                                                                                                                                                                                                                                                                                                                                                                                                 |

SCHOLARONE™  
Manuscripts

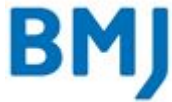

I, the Submitting Author has the right to grant and does grant on behalf of all authors of the Work (as defined in the below author licence), an exclusive licence and/or a non-exclusive licence for contributions from authors who are: i) UK Crown employees; ii) where BMJ has agreed a CC-BY licence shall apply, and/or iii) in accordance with the terms applicable for US Federal Government officers or employees acting as part of their official duties; on a worldwide, perpetual, irrevocable, royalty-free basis to BMJ Publishing Group Ltd ("BMJ") its licensees and where the relevant Journal is co-owned by BMJ to the co-owners of the Journal, to publish the Work in this journal and any other BMJ products and to exploit all rights, as set out in our [licence](#).

The Submitting Author accepts and understands that any supply made under these terms is made by BMJ to the Submitting Author unless you are acting as an employee on behalf of your employer or a postgraduate student of an affiliated institution which is paying any applicable article publishing charge ("APC") for Open Access articles. Where the Submitting Author wishes to make the Work available on an Open Access basis (and intends to pay the relevant APC), the terms of reuse of such Open Access shall be governed by a Creative Commons licence – details of these licences and which [Creative Commons](#) licence will apply to this Work are set out in our licence referred to above.

Other than as permitted in any relevant BMJ Author's Self Archiving Policies, I confirm this Work has not been accepted for publication elsewhere, is not being considered for publication elsewhere and does not duplicate material already published. I confirm all authors consent to publication of this Work and authorise the granting of this licence.

1  
2  
3 **Cohort Profile: The Dutch famine birth cohort (DFBC), a prospective birth cohort study**  
4 **in the Netherlands**  
5  
6

7 Laura S. Bleker<sup>1</sup>, Susanne R. de Rooij<sup>1\*</sup>, Rebecca C. Painter<sup>2</sup>, Anita C.J. Ravelli<sup>2-3</sup>, Tessa J.  
8 Roseboom<sup>1-2</sup>  
9

10  
11  
12 <sup>1</sup>Department of Epidemiology and Data Science, Amsterdam UMC, University of  
13 Amsterdam, The Netherlands  
14

15  
16  
17 <sup>2</sup>Department of Obstetrics and Gynecology, Amsterdam UMC, University of Amsterdam, The  
18 Netherlands  
19

20  
21  
22 <sup>3</sup>Department of Medical Informatics, Amsterdam UMC, University of Amsterdam, The  
23 Netherlands  
24

25  
26  
27  
28  
29 \*Corresponding author:

30  
31 Dep. Epidemiology and Data Science, Amsterdam UMC, University of Amsterdam

32  
33 Meibergdreef 9, 1105 AZ Amsterdam, The Netherlands

34  
35 Email: s. r.derooij@amsterdamumc.nl

36  
37  
38 Tel nr: \*\*31 20 56 64660  
39  
40  
41  
42  
43

44 Word count: 4297  
45  
46  
47  
48  
49  
50  
51  
52  
53  
54  
55  
56  
57  
58  
59  
60

## Abstract

**Purpose:** The Dutch famine birth cohort study is a quasi-experimental cohort study which was set up to investigate the effects of acute maternal undernutrition during specific stages of gestation on the offspring's adult health, with a particular focus on chronic cardiovascular and metabolic diseases, ageing and mental health.

**Participants:** Cohort members include 2414 singletons born alive and at term in the Wilhelmina Gasthuis in Amsterdam around the time of the Dutch famine (1943-1947).

**Findings to date:** Since 1994, several rounds of interviews, physical examinations and data linkage have been collected, allowing repeated measures of a wide range of phenotypic information, including medical history, signs and symptoms of cardiovascular disease, mental health and quality of life, as well as functional tests of the heart, lungs and kidneys. Biological samples have been collected repeatedly (blood, urine and buccal swabs) and lipid and glucose profiles have been assessed, as well as HPA-axis functioning, autonomic nervous system activity, genetic and epigenetic measurements. Also, medical imaging has been used to assess structure and function of carotid and femoral arteries as well as brain structure and function. Studies have shown that prenatal famine exposure has lasting effects on health in later life with robust evidence for associations with cardio-metabolic and mental health. The effects were dependent of its timing during gestation (and the organs and tissues growing at that time), with most effects observed for those exposed to the famine during early gestation. The effects were independent of size at birth.

**Future plans:** As the cohort ages, we will be assessing the effects of prenatal undernutrition on (brain) ageing, cognitive decline and dementia. Plans also include studying cardio-metabolic and mental health and mortality up until around 76 years of age.

1  
2  
3 **Strengths and Limitations:** Strengths of the study include its quasi-experimental design and  
4  
5 the long period of follow up. A limitation is a limited power to show effects of prenatal  
6  
7 undernutrition on adult outcomes especially for those that are relatively rare. In addition,  
8  
9 selective participation and selective survival may have occurred.  
10  
11

12  
13 **Registration:** The Dutch famine birth cohort is not linked to a clinical trial.  
14  
15

16  
17  
18 **Keywords :** Dutch famine, undernutrition, pregnancy, fetal programming, cardiovascular  
19  
20 disease, metabolic disease, brain, ageing  
21  
22

## Introduction

### *Study rationale*

The Dutch famine birth cohort study is a birth cohort of men and women born around the time of the 1944-1945 Dutch famine in the Wilhelmina Gasthuis in Amsterdam, the Netherlands. The study was set up to investigate the effects of prenatal exposure to the Dutch famine on adult health.

### *Fetal origins of health and disease*

Epidemiological studies in populations across the globe have consistently shown that birth weight is inversely associated with levels of blood pressure, serum cholesterol, type 2 diabetes and cardiovascular morbidity and mortality in adulthood (1-7). In 1986, Barker & Osmond suggested that undernutrition during gestation could hamper growth in utero and lead to small size at birth as well as an increased risk of disease in later life (8). In experimental studies in animals, undernutrition during pregnancy induced cardiovascular and metabolic changes in the adult offspring (9, 10). These studies suggest that poor fetal nutrition has long-lasting consequences for adult health. The “Fetal Origins of Health and Disease” hypothesis by David Barker proposed that environmental stimuli during fetal life induce ‘programming’ – a term referring to permanent structural, physiological and metabolic changes in the fetus. While these changes could confer certain fetal advantages in the short term, they were hypothesized to predispose to susceptibility to cardiovascular and metabolic dysfunction and subsequent disease in adult life (11). Early prenatal life in particular is considered a ‘critical’ period, a period in which the fetus is especially susceptible for external influences, since organ structures and associated functions undergo rapid development during that time, and the set-point of physiological and metabolic responses is determined (12). Insufficient nutrition during prenatal

1  
2  
3 development may thus permanently alter certain structural and physiological functions of the  
4 embryo or fetus, eventually leading to poorer health in adulthood. However, human  
5 observational studies are limited by the fact that birth weight is affected by many factors besides  
6 maternal nutrition and does not always adequately reflect nutritional status of the mother during  
7 her pregnancy (13). To bypass potential confounding effects of socio-environmental and  
8 genetic factors on birth weight, semi experimental studies can offer an elegant solution to  
9 investigate causality of short and long-term effects of prenatal undernutrition in humans.  
10  
11  
12  
13  
14  
15  
16  
17  
18  
19

20 The Dutch famine birth cohort study is the first study in humans to directly investigate the long-  
21 term effects of prenatal undernutrition during different trimesters of gestation on adult physical  
22 and mental health. During World War II, part of the Dutch population was exposed to famine  
23 during the severe ‘hunger winter’ of 1944-1945. This historical tragedy has provided the unique  
24 opportunity to study short and long-term effects of famine exposure during intrauterine  
25 development. The Dutch famine can be viewed as a ‘natural experiment’, because of its sudden  
26 onset and end in a previously well-nourished population. The famine was acute, relatively short,  
27 and had an impact on the entire population within the affected regions, minimizing confounding  
28 by genetic inheritance or other simultaneously occurring risk factors, such as socio-economic  
29 status. Also, throughout the famine food rations were precisely registered. It is therefore not  
30 surprising that many researchers have been interested in studying individuals prenatally  
31 exposed to the Dutch famine, from birth up to adulthood, using various methodological  
32 constructs.  
33  
34  
35  
36  
37  
38  
39  
40  
41  
42  
43  
44  
45  
46  
47  
48  
49

### 50 51 ***Historical events leading to the Dutch famine*** 52

53  
54 In 1944-1945, the Dutch famine hit the western parts of the Netherlands towards the end of  
55 World War II, only months before its liberation from the German occupier by the Allied forces.  
56 Before the war, nutritional standards of the Dutch population were generally adequate (14). On  
57  
58  
59  
60



1  
2  
3 the 10<sup>th</sup> of May 1940, the Netherlands were invaded by German forces, with immediate impact  
4  
5 on the Dutch food supply. Food imports from other countries, including the Dutch colonies,  
6  
7 were no longer possible, and part of the food produced in the Netherlands was sent to Germany  
8  
9 (14). The National Bureau for Food Distribution had already implemented food rationing and  
10  
11 distribution prior to the invasion, and was fully operative throughout the entire country by the  
12  
13 end of April 1941. The food rations were determined weekly and recorded in detail. However,  
14  
15 daily rations remained calorically and nutritionally adequate until September 1944, when they  
16  
17 suddenly dropped below 1600 calories (15, 16). On the 17<sup>th</sup> of September 1944, the Dutch  
18  
19 exiled government requested a railroad strike to support the advance of the Allied forces, which  
20  
21 by that time had already liberated the southern part of the Netherlands. The German occupier  
22  
23 responded by an abrupt ban of food transports to the western part of the Netherlands. By  
24  
25 November 1944, food stocks in the large cities in the west of the Netherlands had been  
26  
27 exhausted, and the ban was partly lifted to allow food transport across water. However, due to an  
28  
29 early and exceptionally harsh winter, waterways and canals had frozen over. Food stocks could  
30  
31 no longer be replenished and famine set in for the inhabitants of the large cities in the west,  
32  
33 including Amsterdam, Rotterdam and The Hague. The official daily rations per person dropped  
34  
35 to below 1000 calories in November 1944 and varied between 400 and 800 calories in the  
36  
37 following six months, a period that would later be referred to as the “Hunger Winter”. Children  
38  
39 aged 1 year or younger were relatively protected, as their official daily ration never dropped  
40  
41 below 1000 calories. Although this initially also applied to pregnant and lactating women, this  
42  
43 was no longer possible as the food scarcity persisted. On the fifth of May 1945, the western  
44  
45 parts of the Netherlands were liberated by The Allied Forces. Within a week, daily rations had  
46  
47 rapidly risen above 1000 calories, through supplements by airdrops and the Special Red Cross  
48  
49 Feeding Team (17). By June 1945, rations had risen above 2000 calories. Within weeks, the  
50  
51  
52  
53  
54  
55  
56  
57  
58  
59  
60

1  
2  
3 pre-famine nutritional standards were re-established, and were maintained until the food ration  
4  
5 was permanently lifted, 5 years after the war in 1950 (18, 19).  
6  
7

### 8 9 *Consequences of prenatal undernutrition*

10  
11  
12 Some of the earliest studies on the Dutch famine were published within a few years after World  
13  
14 War II by Smith and Sindram, and focused on the effects of prenatal famine exposure on birth  
15  
16 outcomes. Based on the assumption of a severe generalized undernutrition in urban areas, they  
17  
18 obtained birth records from babies born around the Dutch famine in hospitals in Amsterdam,  
19  
20 Rotterdam, and The Hague, and compared their birth weights to that of babies born before the  
21  
22 famine. Birth weight was shown to be 240 to 340 grams lower in those exposed to the Dutch  
23  
24 famine in utero (20, 21).  
25  
26  
27  
28

29  
30 In the 70's, Professor Zena Stein and Professor Mervin Susser were primarily interested in the  
31  
32 effects of prenatal undernutrition on mental performance in early adulthood. They used data  
33  
34 from 19-year old Dutch military conscripts, who had all been medically examined and  
35  
36 psychologically tested. Given their date and place of birth, Stein and Susser retrospectively  
37  
38 reconstructed birth cohorts prenatally exposed to famine (defined as born in one of seven  
39  
40 famine-stricken cities in the west: Amsterdam, Leiden, Haarlem, Utrecht, the Hague,  
41  
42 Rotterdam, Delft) and compared them to cohorts of individuals who had not been exposed  
43  
44 (defined as born in one of the control cities in the north, east or south: Maastricht, Heerlen,  
45  
46 Breda, Tilburg, Eindhoven, Enschede, Helmond, Hengelo, Zwolle, Leeuwarden, Groningen).  
47  
48 They did not find an association between the frequency of a diagnosis of 'severe mental  
49  
50 retardation' or Intelligence Quotient and prenatal famine exposure in 19-year old men (19).  
51  
52  
53 However, an increased prevalence of obesity was shown among those military conscripts who  
54  
55 were exposed to famine during early gestation, a relatively rare condition at the time (22, 23).  
56  
57  
58  
59  
60

1  
2  
3 Thereafter, in 1975, Stein and Susser replicated findings from Smith and Sindram using data  
4 from additional famine-stricken cities. They collected birth records of maternities from teaching  
5 hospitals in affected areas (Amsterdam, Leiden, and Rotterdam) and in non-affected areas  
6 (Groningen in the north, Heerlen in the south). In their analyses, they compared birth cohorts  
7 defining exposure both according to timing of birth (born outside or during the famine, in the  
8 same area) and on place of birth (born in affected or unaffected areas, in the same period). They  
9 showed that food intake in the third trimester negatively affected birth weight, infant length,  
10 head circumference, placental weight and maternal weight at the end of pregnancy. Moreover,  
11 the effects on size at birth were shown to be independent of gestational age and occurred only  
12 below an empirical threshold of an average daily food ration of 1500 calories or less (24, 25).  
13  
14  
15  
16  
17  
18  
19  
20  
21  
22  
23  
24  
25

26  
27 Another approach twenty years later by Ezra Susser, Hoek and Brown comprised of  
28 retrospectively analysing data from the Dutch Psychiatry Registry. The registry ascertains cases  
29 of psychiatric disorder resulting in hospitalization, and included information on diagnosis as  
30 well as on date and place of birth. Based on this information, cases were retrospectively  
31 allocated to exposed or unexposed birth cohorts. Increased rates for schizophrenia (26, 27), and  
32 affective disorders (28, 29) were observed in those prenatally exposed to famine. Re-entering  
33 the data from military conscripts in men, higher rates for schizophrenia (30), a schizoid  
34 personality (31) and an antisocial personality disorder (32), based on the psychiatric  
35 assessments at conscription using the International Classification of Diseases, were described  
36 in individuals exposed to the Dutch famine during intrauterine development.  
37  
38  
39  
40  
41  
42  
43  
44  
45  
46  
47  
48  
49

50  
51 A retrospective female Dutch famine birth cohort was established during the 1980-1990's,  
52 prospectively examining next generation reproductive outcomes after maternal prenatal famine  
53 exposure, including their offspring's birth weight (33, 34). All 1116 women born during the  
54 famine in the Wilhelmina Gasthuis (WG) in Amsterdam and before and after the famine (Aug  
55  
56  
57  
58  
59  
60

1  
2  
3 1, 1944- April 15, 1946) were traced through the national population registers. Information on  
4  
5 their date of birth and birthweight was collected from medical records retrieved from the city  
6  
7 archives of Amsterdam. A total of 683 women were interviewed at their homes at the mean age  
8  
9 of 43 years, and were all able to recall the birth weight of their children (34). This study design  
10  
11 avoided sampling bias as a specific set of adult outcomes was assessed in an entire birth cohort  
12  
13 of exposed female individuals. The authors concluded that maternal prenatal famine exposure  
14  
15 did not affect the association between maternal and offspring birth weight.  
16  
17  
18  
19  
20  
21  
22  
23  
24  
25  
26  
27  
28  
29  
30  
31  
32  
33  
34  
35  
36  
37  
38  
39  
40  
41  
42  
43  
44  
45  
46  
47  
48  
49  
50  
51  
52  
53  
54  
55  
56  
57  
58  
59  
60

Or peer review only

## Cohort description

### *Eligibility*

In 1994, the Dutch famine birth cohort was set up in the Academic Medical Centre in Amsterdam, the Netherlands. All men and women born as term singletons between November 1, 1943 and February 28, 1947 in the Wilhelmina Gasthuis (WG) in Amsterdam were eligible candidates to be included in the Dutch famine birth cohort. The WG was the main maternity hospital in Amsterdam at the time of the famine and birth records were still kept at the city archive of Amsterdam (34). Only live born singletons after a full-term pregnancy were included ( $\geq 259$  days gestational age, calculated either from the date of the last menstrual period or by the obstetrician's estimation at first prenatal visit and at physical examination of the child at birth).

### *Study participants*

The birth ledgers, which contained general information on date of birth, name of the parents and identification number were retrieved from the Obstetrics department of the Academic Medical Center (the former WG) in Amsterdam of individuals born between November 1, 1943 and February 28, 1947. From the 5425 records, all individuals exposed to famine, according to our definition (see below), were considered eligible exposed candidates. A random sample of eligible individuals unexposed to famine during gestation (born before the famine or conceived after the famine) was taken. Twins and stillbirths were excluded. This resulted in 2680 eligible candidates for which the detailed medical records were searched and coded in all detail in the city archive of Amsterdam. Of these 2680 individuals, 27 individuals (1.0%) were excluded because their medical records were missing or incomplete, and 239 individuals (8.9%) were excluded based on their preterm birth ( $< 259$  days gestational age). Ultimately, 2414 people

1  
2  
3 were considered eligible (821 live born term singletons exposed to famine prenatally, 764 live  
4 born term singletons born before the famine and 829 live born term singletons conceived after  
5 the famine).  
6  
7  
8  
9

### 10 *Exposure to famine*

11  
12  
13  
14 Exposure to famine during gestation was defined as an average maternal daily ration of less  
15 than 1000 calories during any 13-week period of gestation (35). According to the official daily  
16 rations of the general population, children born in Amsterdam between January 7, 1945 and  
17 December 8, 1945, were considered to be exposed to famine during prenatal life. Three 16-  
18 week periods were distinguished; children who were mainly exposed during *late* gestation (born  
19 between January 7 and April 28, 1945), *mid* gestation (born between April 29 and August 18,  
20 1945) or *early* gestation (born between August 19 and December 8, 1945). A sample of the  
21 individuals born within one year before the famine or conceived up to one year after the end of  
22 the famine were eligible for controls as comparisons. Being unexposed to famine was defined  
23 as being born before the famine (born between November 1, 1943 and January 7, 1945), or  
24 conceived after the famine (born between December 9, 1945 and February 28, 1947) (Figure  
25  
26  
27  
28  
29  
30  
31  
32  
33  
34  
35  
36  
37  
38  
39  
40  
41  
42  
43  
44  
45  
46  
47  
48  
49  
50  
51  
52  
53  
54  
55  
56  
57  
58  
59  
60  
1).

**Figure 1.** Dutch famine birth cohort schematic presentation of gestational famine exposure.

### 51 *Maternal and birth characteristics*

52  
53  
54  
55 Maternal and birth characteristics of the 2414 eligible men and women are presented in Table  
56 1, according to timing of exposure to famine (born before the famine, exposed in late gestation,  
57 exposed in mid-gestation, exposed in early gestation, conceived after the famine). Medical  
58  
59  
60

1  
2  
3 records contained information on maternal characteristics including maternal weight and blood  
4  
5 pressure throughout pregnancy as well as a detailed description of delivery and the postpartum  
6  
7 period. Also, they included detailed information about the size of the baby and placenta at birth.  
8  
9  
10 Records were completed at every prenatal visit (usually every 2 weeks), typically starting at the  
11  
12 end of the second trimester.  
13  
14  
15

16  
17 Maternal characteristics included maternal age, marital status, reproductive and medical  
18  
19 history, and occupation of the head of the family. Blood pressure and maternal weight were  
20  
21 measured. Pelvic measurements were taken, including the interspinous distance (the distance  
22  
23 between the anterior superior iliac spines). Maternal weight gain in the third trimester was  
24  
25 estimated as the difference between the woman's weight at the last prenatal visit and her weight  
26  
27 as close as possible to the start of the third trimester, multiplied by the ratio of trimester duration  
28  
29 (13 weeks) and the time interval between the two weight measurements.  
30  
31  
32  
33  
34

35 Birth characteristics included date of birth, sex, birth weight, and birth length (crown-to-heel).  
36  
37 Head circumference was calculated by:  $\pi * (\text{biparietal diameter} + \text{occipitofrontal diameter}) * 0.5$ .  
38  
39 Ponderal index was calculated by:  $\text{birth weight} / (\text{crown-to-heel}^2)$ . Placental area was  
40  
41 calculated by:  $\pi * \text{placental length} * \text{placental width} * 0.25$ . At discharge, infant weight and  
42  
43 type of feeding (exclusive breastfeeding/exclusive bottle-feeding/a combination) were  
44  
45 recorded. Besides information from the medical records for each women the profession of the  
46  
47 father / the head of the family was collected using the hospital admission "crib cards" and coded  
48  
49 as manual or non-manual work. In 1945, 57% of the population in Amsterdam was estimated  
50  
51 to be of poor social economic class. The WG hospital typically facilitated deliveries for  
52  
53 unmarried women and women with poor housing/ socioeconomic conditions [35].  
54  
55  
56  
57  
58  
59  
60

**Table 1.** Maternal characteristics and birth outcomes of 2414 singleton children born alive and at term in the Wilhelmina Gasthuis in Amsterdam between 1 November 1943 and 28 February 1947.

|                                          | Exposure to Famine      |                            |                           |                             |                             | Total<br>(SD)   | Missing<br>(n) |
|------------------------------------------|-------------------------|----------------------------|---------------------------|-----------------------------|-----------------------------|-----------------|----------------|
|                                          | Born<br>before<br>n=764 | Late<br>gestation<br>n=307 | Mid<br>gestation<br>n=297 | Early<br>gestation<br>n=217 | Conceived<br>after<br>n=829 | n=2414          |                |
| <b>Maternal characteristics</b>          |                         |                            |                           |                             |                             |                 |                |
| Age (years)                              | 28.5                    | 30.0                       | 28.1                      | 27.7                        | 28.0                        | 28.3 (6.4)      | 0              |
| Never married<br>(%)                     | 13.2                    | 9.8                        | 20.2                      | 25.8                        | 16.3                        | 15.8            | 0              |
| Weight gain<br>third trim. (kg)          | 3.1                     | 0.0                        | 4.9                       | 5.7                         | 4.2                         | 3.5 (3.2)       | 732            |
| Weight at last<br>prenatal visit<br>(kg) | 66.7                    | 61.8                       | 63.5                      | 67.9                        | 69.1                        | 66.6 (8.7)      | 281            |
| Interspinous<br>distance (cm)            | 26.1                    | 25.8                       | 25.5                      | 25.8                        | 26.3                        | 26.0 (1.8)      | 14             |
| <b>Birth outcomes</b>                    |                         |                            |                           |                             |                             |                 |                |
|                                          | Born<br>before<br>n=764 | Late<br>gestation<br>n=307 | Mid<br>gestation<br>n=297 | Early<br>gestation<br>n=217 | Conceived<br>after<br>=829  | Total<br>n=2414 |                |
| Boys (%)                                 | 53.1                    | 48.2                       | 48.5                      | 49.8                        | 52.5                        | 51.4            |                |
| First born (%)                           | 39.7                    | 29.6                       | 36.7                      | 39.2                        | 39.3                        | 37.9            |                |
| Pregnancy<br>duration (days)             | 285                     | 283                        | 285                       | 287                         | 286                         | 285 (11)        | 371            |



|                                     |      |      |      |      |      |            |     |
|-------------------------------------|------|------|------|------|------|------------|-----|
| Birth weight (g)                    | 3373 | 3133 | 3217 | 3470 | 3413 | 3346 (478) | 0   |
| Body length (cm)                    | 50.5 | 49.4 | 49.8 | 50.9 | 50.5 | 50.3 (2.2) | 32  |
| Ponderal index (kg/m <sup>3</sup> ) | 26.1 | 25.8 | 26.0 | 26.2 | 26.5 | 26.4 (2.4) | 32  |
| Head circumference (cm)             | 32.9 | 32.3 | 32.1 | 32.8 | 33.2 | 32.8 (2.4) | 17  |
| Placental diameter (cm)             | 20.6 | 19.7 | 20.0 | 19.9 | 20.2 | 20.2 (2.5) | 357 |

\*Adapted from Table 1, Page 59, Ravelli et al. (36)

### ***Follow-up***

In 1994, current addresses of the children born before, during and after the famine were requested from the population registry (Bevolkingsregister) in Amsterdam, which traced 2155 of the 2414 eligible participants. Of these, 265 persons had died, 199 had emigrated, and another 164 refused to share their address, resulting in 1527 (63.3%) of 2155 cases. Power calculations for a study sample to be invited for interviewing and clinical measurements were based on the 120-min glucose concentrations after a 75 gram oral glucose load as the main outcome variable, based on pooled data from three previous MRC Southampton studies (Hertfordshire, Preston and Sheffield). To detect an increase of 10% in the 120-minute glucose concentration, a sample size of 700 men and women (450 prenatally exposed and 250 unexposed persons) was needed for 93% power and a 5% type 1 error probability (two-sided). A 70% participation rate for the oral glucose load test was assumed and based on this, interviews with 1000 men and women at their homes were planned. We invited all people in each of the 5 exposure/non-exposure groups, starting with those who lived in, or close to, Amsterdam (n=1018) to participate in the first

1  
2  
3 study, of whom 912 (90%) agreed to be interviewed at their homes and 741 (81%) of the  
4 interviewed participants visited the clinic for measurements (35).  
5  
6  
7

8  
9 Data collection of the Dutch famine birth cohort study has occurred in five study waves from  
10 1994/6 until 2018, and a sixth wave is currently (2019-2020) in progress. Measurements  
11 consisted of a home interview at age 50 and a hospital visit around the ages of 50 (wave I, 1994  
12 - 1996), 58 (wave II, 2002-2004), 63 (wave III, 2008-2009) and 68 (wave IV, 2013), and  
13 completion of a questionnaire by the participants at age 73 (wave V, 2018). Another hospital  
14 visit at age 74-75 is currently ongoing (wave VI, 2019-2020). At wave V in 2018, 1207 of the  
15 1527 participants were still living in the Netherlands with known addresses (79%), of which  
16 595 agreed to participate (49%). The sixth wave is currently in progress.  
17  
18  
19  
20  
21  
22  
23  
24  
25  
26  
27

### 28 ***Measurements***

29  
30  
31  
32 Table 2 gives a summary of the study waves, including the mean ages of the famine exposed  
33 participants during that wave, with outcome measures and a description of participation rates.  
34  
35  
36

### 37 ***Patient and Public Involvement statement***

38  
39  
40  
41 Cohort members are informed about study aims and outcomes via newsletters and the studies  
42 website [www.hongerwinter.nl](http://www.hongerwinter.nl). Cohort members have not been involved in setting up research  
43 questions and data collection, study design, recruitment strategies, assessment of study burden  
44 and dissemination of study results.  
45  
46  
47  
48  
49  
50  
51  
52  
53  
54  
55  
56  
57  
58  
59  
60

**Table 2.** Dutch famine birth cohort study waves, including the mean ages of the participants at examination, the outcome measures and a description of attrition rates.

| Phase                                   | Measurement                                                                                                                                                                                                                                                                                                                                                                                                                                                                                                                                                                                                                                                                         | Loss of follow-up                                                                                                                                                                                                                                                              |
|-----------------------------------------|-------------------------------------------------------------------------------------------------------------------------------------------------------------------------------------------------------------------------------------------------------------------------------------------------------------------------------------------------------------------------------------------------------------------------------------------------------------------------------------------------------------------------------------------------------------------------------------------------------------------------------------------------------------------------------------|--------------------------------------------------------------------------------------------------------------------------------------------------------------------------------------------------------------------------------------------------------------------------------|
| <b>Wave I</b><br>1994-1996              | <b>Wave 1a birth data collection/ exposure definition/ mortality status</b>                                                                                                                                                                                                                                                                                                                                                                                                                                                                                                                                                                                                         |                                                                                                                                                                                                                                                                                |
| <b>Wave I</b><br>(Age 50)<br>1994– 1996 | <b>Wave Ib (home interview)</b> <ul style="list-style-type: none"> <li>- Questionnaires (General information, medical information, life style factors, physical activity, weight history, reproductive history, EPIC Food frequency questionnaire, self-perceived health and medication use) (37, 38)</li> <li>- Anthropometrics (39)</li> <li>- Blood pressure (40, 41)</li> </ul><br><b>Wave Ic (hospital visit)</b> <ul style="list-style-type: none"> <li>- Blood pressure (40, 41)</li> <li>- Glucose tolerance test (35)</li> <li>- ECG (42)</li> <li>- Lung function (43)</li> <li>- Urine collection (44)</li> <li>- Lipid profile and clotting factors (45, 46)</li> </ul> | 912 (90%) of the 1018 selected participants were interviewed at their homes (Wave Ib), 741 (81%) agreed to visit the AMC clinic (Wave Ic). There were no differences in the mean birth weight of the 741 who attended the clinic and the 2414 children in the original cohort. |

|                                                        |                                                                                                                                                                                                                                                                                                                                                                                                                                                                                                                                                                                                                                                                                                                                                                                                                                                                                                                                                                                                                                                    |                                                                                                                                                           |
|--------------------------------------------------------|----------------------------------------------------------------------------------------------------------------------------------------------------------------------------------------------------------------------------------------------------------------------------------------------------------------------------------------------------------------------------------------------------------------------------------------------------------------------------------------------------------------------------------------------------------------------------------------------------------------------------------------------------------------------------------------------------------------------------------------------------------------------------------------------------------------------------------------------------------------------------------------------------------------------------------------------------------------------------------------------------------------------------------------------------|-----------------------------------------------------------------------------------------------------------------------------------------------------------|
| <p><b>Wave II</b></p> <p>(Age 58)</p> <p>2002-2004</p> | <p><b>Wave IIa (hospital visit)</b></p> <ul style="list-style-type: none"> <li>- Questionnaires (General information, medical information, lifestyle factors, physical activity, weight history reproductive history, transgenerational effects, self-perceived health) (47-54)</li> <li>- Glucose tolerance test (55-57)</li> <li>- Anthropometrics</li> <li>- Blood pressure</li> <li>- ECG (58)</li> <li>- Urine collection (44)</li> <li>- Cognitive function (59)</li> <li>- Ultrasound examinations of the arterial walls of the carotid and femoral arteries (60, 61)</li> <li>- Physical function (62)</li> <li>- Psychological Stress tests (63-66)</li> <li>- Genomic DNA from blood plasma (67-71)</li> </ul> <p><b>Wave IIb (hospital visit)</b></p> <ul style="list-style-type: none"> <li>- Intravenous glucose tolerance test in a subsample (<math>n=94</math>) (59)</li> </ul> <p><b>Wave IIc (hospital visit)</b></p> <ul style="list-style-type: none"> <li>- Synacthen test in a subsample (<math>n=98</math>) (69)</li> </ul> | <p>860 (60%) of 1423 eligible candidates agreed to participate. There were no differences in mean birth weight between responders and non-responders.</p> |
|--------------------------------------------------------|----------------------------------------------------------------------------------------------------------------------------------------------------------------------------------------------------------------------------------------------------------------------------------------------------------------------------------------------------------------------------------------------------------------------------------------------------------------------------------------------------------------------------------------------------------------------------------------------------------------------------------------------------------------------------------------------------------------------------------------------------------------------------------------------------------------------------------------------------------------------------------------------------------------------------------------------------------------------------------------------------------------------------------------------------|-----------------------------------------------------------------------------------------------------------------------------------------------------------|

|                                                           |                                                                                                                                                                                                                                                                                                                                                                                                                                                                                                                                                                                                                                                                                                                                                                                                                                          |                                                                                                                                                                                                                                                                                                                                                                                                                                                                                                                                                                                                        |
|-----------------------------------------------------------|------------------------------------------------------------------------------------------------------------------------------------------------------------------------------------------------------------------------------------------------------------------------------------------------------------------------------------------------------------------------------------------------------------------------------------------------------------------------------------------------------------------------------------------------------------------------------------------------------------------------------------------------------------------------------------------------------------------------------------------------------------------------------------------------------------------------------------------|--------------------------------------------------------------------------------------------------------------------------------------------------------------------------------------------------------------------------------------------------------------------------------------------------------------------------------------------------------------------------------------------------------------------------------------------------------------------------------------------------------------------------------------------------------------------------------------------------------|
| <p><b>Wave III</b></p> <p>(Age 63)</p> <p>2008 - 2009</p> | <ul style="list-style-type: none"> <li>- Questionnaires (General information, medical information, lifestyle factors, physical activity, weight history reproductive history, transgenerational effects, self-perceived health) (72-74)</li> <li>- Transgenerational effects based on F2 questionnaire (General information, birth characteristics, self-perceived health, exercise, medical information, lifestyle factors) (75)</li> <li>- F0-F1-F2 (grandmother-parent-child) buccal swab for DNA methylation</li> </ul>                                                                                                                                                                                                                                                                                                              | <p>601 (44%) of 1372 eligible candidates agreed to participate. 483 F2s (grandchildren) were willing to participate, of which 360 (74.5%) completed the questionnaire. Birthweight or gestational age did not differ between F1 participants and F1 non-participants.</p>                                                                                                                                                                                                                                                                                                                              |
| <p><b>Wave IV</b></p> <p>(age 68)</p> <p>2013</p>         | <ul style="list-style-type: none"> <li>- Questionnaires (General information, medical information, lifestyle factors, physical activity, weight history reproductive history, transgenerational effects, self-perceived health)</li> <li>- Anthropometrics</li> <li>- Blood pressure</li> <li>- Glucose concentration (non-fasting)</li> <li>- Lipid profile (non-fasting)</li> <li>- Cognitive function</li> <li>- Brain Imaging (MRI) (white matter hyper intensities, cerebral micro bleeds, total cortical, hippocampal and lacunar volume, brain perfusion, resting brain state conditions, BrainAge, brain perfusion) (76-78)</li> <li>- Ageing parameters (Stroke incidence, fractures and osteoporosis, physical performance, visual acuity, cataract, hearing) (79)</li> <li>- Cellular aging (telomere length) (80)</li> </ul> | <p>Equal samples were drawn randomly from each of the groups (1307 eligible candidates in total) until the number of 50 people per exposure group (born before famine, exposed in early gestation, conceived after famine) agreeing to participate was reached. A total number of 151 participants of an eligible group of 268 cohort members (56%) were visited at home. There was a difference in birth weight between the participants (<math>n=150</math>) and the nonparticipants (<math>n=1,157</math>) of the eligible group (<math>n=1,307</math>), 3,438 vs 3,346g; <math>p = .03</math>.</p> |
| <p><b>Wave V</b></p>                                      | <ul style="list-style-type: none"> <li>- Questionnaires (including self-perceived health, daily life functioning, pain complaints, mood, memory, attention, and cognition, diseases, tasks and activities</li> </ul>                                                                                                                                                                                                                                                                                                                                                                                                                                                                                                                                                                                                                     | <p>595 (49%) of 1207 eligible candidates agreed to participate. Data analyses are currently ongoing.</p>                                                                                                                                                                                                                                                                                                                                                                                                                                                                                               |

|                                                             |                                                                                                                                                                                                                                                                                                                                                                                                                                                                                                                                                                                                                                                                        |                |
|-------------------------------------------------------------|------------------------------------------------------------------------------------------------------------------------------------------------------------------------------------------------------------------------------------------------------------------------------------------------------------------------------------------------------------------------------------------------------------------------------------------------------------------------------------------------------------------------------------------------------------------------------------------------------------------------------------------------------------------------|----------------|
| (age 73)<br>2018                                            | in daily life, social activities, quality of life, medical care consumption, stressful events, health problems resulting from stressful events, and childhood experiences)                                                                                                                                                                                                                                                                                                                                                                                                                                                                                             |                |
| <b>Wave VI-<br/>(Ongoing)</b><br>(age 74-75)<br>2019 - 2020 | <ul style="list-style-type: none"> <li>- Questionnaires (General information, medical information, lifestyle factors, physical activity, weight history reproductive history, transgenerational effects, self-perceived health)</li> <li>- Anthropometrics</li> <li>- Glucose (non-fasting)</li> <li>- Lipid profile (non-fasting)</li> <li>- Blood pressure</li> <li>- Cognitive function</li> <li>- Brain Imaging (MRI) (white matter hyper intensities, cerebral micro bleeds, structural total and area brain volumes, brain perfusion, BrainAge, resting brain state conditions, active brain state conditions during Stroop selective attention task)</li> </ul> | <i>Ongoing</i> |

## Findings to date

### *1. Prenatal famine exposure has lasting effects on health*

Table 3 gives an overview of findings in the Dutch famine birth cohort study. Exposure to famine was associated with a three-fold higher risk for (42) and earlier onset of coronary heart disease (CHD) (58), a more atherogenic lipid profile (45), glucose intolerance (35, 55), a disturbed blood coagulation (46), microalbuminuria and a decrease in creatinine clearance (44), as well as more respiratory complaints and obstructive airways disease in adulthood (43). Also, those exposed to famine during gestation were more likely to consume a high-fat diet (48), and more often perceived their own health as 'poor' (37). Although there was no indication that prenatal undernutrition increased resting blood pressure (40), those exposed to undernutrition *in utero* had a higher increase in systolic blood pressure in response to a stressful assignment compared to unexposed individuals (63). Moreover, they performed worse on a selective attention task, a cognitive ability that usually declines with increasing age (59). Women prenatally exposed to famine were more centrally obese (39), had a five times increased risk for developing breast cancer (52), and an overall higher mortality rate, as well as a higher cardiovascular mortality, cancer mortality, and breast cancer mortality (81). In men, exposure to famine during gestation was associated with smaller intracranial volume (76). Moreover, their brain appeared older, as assessed by a machine-learning pattern recognition method that is able to estimate individual brain ages based on T1-weighted MR images, and overall perfusion of the brain was worse compared to controls (77, 78). Also, prenatal exposure to famine was associated with increased symptoms of depression and anxiety (49), and a lower physical performance score (79) in men. In terms of transgenerational effects, babies born to women exposed to famine prenatally were more adipose as neonates, and parents that had been exposed to famine in utero themselves more often reported their child to have a poorer health

1  
2  
3 (54). Offspring of men exposed to famine in utero had an increased weight and a higher BMI  
4  
5 at age 37 years (75).  
6  
7

8  
9 **2. The effects were dependent of its timing during gestation (and the organs and tissues**  
10 **growing at that time)**  
11  
12

13  
14 Our findings suggest that famine exposure during periods of rapid organ growth permanently  
15 affects organ structure. The majority of adverse effects of prenatal famine on several (precursors  
16 of) chronic diseases were observed specifically in those exposed during **early** gestation (37, 39,  
17 42, 45, 46, 48, 49, 52, 58, 59, 63, 76-79, 81). Since organogenesis takes place in early gestation  
18 it is not surprising that exposure to undernutrition during this critical period of development has  
19 the most detrimental effects on later life physical and mental health. The effects on renal  
20 function and respiratory complaints were observed only in those who had experienced famine  
21 in utero during *mid* gestation (43, 44). This fits with the stage of rapid expansion of nephron  
22 number and of rapid bronchial tree branching in mid-pregnancy in fetuses (82). Finally, across  
23 all trimesters, but particularly in *mid and late* gestation, famine was associated with offspring  
24 glucose intolerance in later life (35, 55). During mid and late gestation, the endocrine pancreas  
25 undergoes rapid proliferation (83). Altogether, our findings are highly suggestive of specific  
26 windows of increased sensitivity for negative effects of famine on various organ systems,  
27 depending on the gestational period in which cell division is at its peak.  
28  
29  
30  
31  
32  
33  
34  
35  
36  
37  
38  
39  
40  
41  
42  
43  
44  
45  
46  
47

48 **3. The effects were independent of size at birth**  
49  
50

51 One of the findings of the Dutch famine birth cohort study is that babies born after exposure to  
52 the famine in *mid* (difference = -165 gr, 95%CI -220 to -109) or *late* (difference = -257 gr,  
53 95%CI = -312 to -202) gestation had lower birth weights, whereas babies born after exposure  
54 to the famine in *early* (difference = 79 gr, 95%CI = 16 to 143) gestation had higher birth weight  
55  
56  
57  
58  
59  
60



1  
2  
3 compared to controls (36) (Table 1). This is tremendously striking, since the long-term  
4 programming effects of prenatal maternal undernutrition on adult health have traditionally been  
5  
6 assumed to be mediated by poor fetal growth and hence marked by a low birth weight. However,  
7  
8 we found that the majority of the effects of prenatal famine exposure on adverse health  
9  
10 outcomes in adults were observed in those exposed to famine in *early* gestation, and thus, in  
11  
12 those with normal birth weight. Moreover, additional adjustment for birthweight showed that  
13  
14 the effect of prenatal exposure to famine on the adult physical and mental health outcomes were  
15  
16 independent of birthweight. In other words, prenatal famine had a major negative affect on adult  
17  
18 health, without affecting birth weight. Our findings thus suggest that adverse effects of maternal  
19  
20 famine exposure on fetal organ development and function are independent of size at birth.  
21  
22  
23  
24  
25  
26

27 Further information, including a list of publications can be found on the cohort's web-page  
28  
29 [[www.hongerwinter.nl](http://www.hongerwinter.nl)].  
30  
31  
32  
33  
34  
35  
36  
37  
38  
39  
40  
41  
42  
43  
44  
45  
46  
47  
48  
49  
50  
51  
52  
53  
54  
55  
56  
57  
58  
59  
60

**Table 3.** Adult characteristics of the Dutch famine birth cohort study from the age of 50 years, divided in columns based upon the gestational period of prenatal famine exposure.

| Age | Ref  | Adult characteristics                   | Born before | Late gestation | Mid gestation | Early gestation | Conceived after | Mean (sd)    | n   |
|-----|------|-----------------------------------------|-------------|----------------|---------------|-----------------|-----------------|--------------|-----|
| 50  | (42) | Coronary Heart Disease (%)              | 3.8         | 2.5            | 0.9           | <b>8.8*</b>     | 2.6             | 3.3          | 736 |
|     | (45) | LDL:HDL cholesterol <sup>1</sup>        | 2.91        | 2.82           | 2.69          | 3.26            | 2.94            | 2.90 (1.53)  | 704 |
|     | (35) | 120 min. Glucose <sup>1</sup> (mmol/L)  | 5.7         | <b>6.3*</b>    | <b>6.1*</b>   | <b>6.1*</b>     | 5.9             | 6.0 (1.4)    | 702 |
|     |      | 120 min. insulin <sup>1</sup> (mmol/L)  | 160         | <b>200*</b>    | <b>190*</b>   | <b>207*</b>     | 181             | 181 (2.4)    | 694 |
|     | (46) | Fibrinogen (g/l)                        | 3.02        | 3.05           | 3.05          | 3.21            | 3.10            | 3.07 (0.6)   | 725 |
|     |      | Factor VII <sup>1</sup> (% of standard) | 127.7       | 130.7          | 132.7         | <b>116.9*</b>   | 132.6           | 129.4 (1.4)  | 725 |
|     | (40) | SBP (mmHg)                              | 126.0       | 127.4          | 124.8         | 123.4           | 125.1           | 125.5 (15.5) | 739 |
|     |      | DBP (mmHg)                              | 86.2        | 86.4           | 84.4          | 84.8            | 85.2            | 85.6 (9.9)   | 739 |
|     | (39) | BMI <sup>1</sup> (kg/m <sup>2</sup> )   | 26.7        | 26.7           | 26.6          | <b>28.1*</b> ♀  | 27.2            | 27.0 (1.2)   | 741 |
|     |      | Waist circumference (cm)                | 91.8        | 92.4           | 91.0          | <b>95.6*</b> ♀  | 92.5            | 92.3 (13)    | 741 |
|     | (37) | Perceived health poor (%)               | 4.5         | 6.4            | 3.7           | <b>10.3*</b>    | 5.3             | 5.5          | 912 |
|     | (44) | Microalbuminuria (ACR ≥ 2.5) (%)        | 8           | 7              | <b>12*</b>    | 9               | 4               | 7            | 724 |
|     | (43) | FEV1/FVC (x100)                         | 0.72        | 0.72           | 0.72          | 0.72            | 0.74            | 0.72 (0.1)   | 726 |

|      |                           | Obstructive airways disease (%)            | 15.5        | 15.0           | <b>24.8*</b>  | 23.0            | 17.3            | 18.1        | 726  |
|------|---------------------------|--------------------------------------------|-------------|----------------|---------------|-----------------|-----------------|-------------|------|
|      |                           | Total IgE <sup>1</sup> (IU/ml)             | 31.0        | 27.2           | 28.9          | 27.9            | 33.1            | 30.4 (4.6)  | 726  |
|      | (84)                      | Mortality 18–50 years (%)                  | 5.3         | 3.9            | 2.8           | 5.0             | 3.6             | -           | 2254 |
| Age  | Ref                       | Adult characteristics                      | Born before | Late gestation | Mid gestation | Early gestation | Conceived after | Mean (sd)   | n    |
| 58   | (63)                      | ΔSBP (mmHg)                                | 19          | 20             | 19            | <b>23*</b>      | 19              | 20 (16)     | 721  |
|      |                           | Stroop Response                            |             |                |               |                 |                 |             |      |
|      | (55, 56)                  | 120 min. Glucose <sup>1</sup> (mmol/L)     | 5.8         | <b>6.2*</b>    | <b>6.2*</b>   | <b>6.2*</b>     | 5.9             | 6.0         | 678  |
|      |                           | 120 min. insulin <sup>1</sup> (pmol/L)     | 242         | <b>263*</b>    | <b>254*</b>   | <b>269*</b>     | 240             | 249 (2.1)   | 672  |
|      | (48)                      | >39% of energy from fat (%)                | 25.9        | 28.7           | 20.2          | <b>40.7*</b>    | 24.9            | -           | 730  |
|      | (59)                      | Stroop Task Score <sup>2</sup> (% correct) | 42.3        | 36.5           | 40.0          | <b>27.5*</b>    | 43.9            | 38.5 (55.7) | 714  |
|      |                           | AH4 test Score <sup>2</sup> (% correct)    | 70.9        | 72.4           | 71.8          | 76.0            | 73.3            | 72.4 (19.0) | 727  |
|      |                           | Memory task Retrieval (%)                  | 81.8        | 78.5           | 83.2          | 79.7            | 79.6            | 80.7(19.9)  | 583  |
|      |                           | Mirror Task Errors per round <sup>2</sup>  | 13          | 12             | 10            | 14              | 10              | 12 (30)     | 643  |
|      | (52)                      | Breast Cancer (%)                          | 2.8         | 3.7            | 3.9           | <b>8.7*</b>     | 0.8             | 3.2         | 475  |
| (85) | Mortality 18-57 years (%) | 9.1                                        | 4.4         | 6.0            | 6.5           | 5.9             | -               | 2245        |      |

|                                                           | (49)    | HADS-A score                                   | 4.5               | 4.7             | 5.1           | 5.8                       | 5.1               | 4.9 (3.1)   | 639  |
|-----------------------------------------------------------|---------|------------------------------------------------|-------------------|-----------------|---------------|---------------------------|-------------------|-------------|------|
|                                                           |         | HADS-A $\geq$ 8 points (OR)                    | 1.0 (ref)         | 0.7             | 1.1           | <b>2.7*</b> <sup>♂</sup>  | 1.0               | -           | 369  |
|                                                           |         | HADS-D                                         | 3.1               | 3.0             | 3.1           | <b>4.9*</b> <sup>♂</sup>  | 3.6               | 3.2 (3.1)   | 369  |
|                                                           |         | HADS-D $\geq$ 8 points (OR)                    | 1.0 (ref)         | 0.9             | 0.6           | 1.7                       | 1.0               | -           | 369  |
| Age                                                       | Ref     | Adult characteristics                          | Born before       | Late gestation  | Mid gestation | Early gestation           | Conceived after   | Mean (sd)   | n    |
| <b>63</b>                                                 | (81)    | Overall adult mortality (HR)                   | 1.0 (ref)         | 0.8             | 0.5           | <b>1.9*</b> <sup>♀</sup>  | 1.0 (ref)         | -           | 1125 |
|                                                           |         | Cardiovascular mortality (HR)                  | 1.0 (ref)         | - (zero deaths) | 0.6           | <b>4.6*</b> <sup>♀</sup>  | 1.0 (ref)         | -           | 1125 |
|                                                           |         | Cancer mortality (HR)                          | 1.0 (ref)         | 1.0             | 0.5           | <b>2.3*</b> <sup>♀</sup>  | 1.0 (ref)         | -           | 1125 |
|                                                           |         | Breast cancer mortality (HR)                   | 1.0 (ref)         | 2.1             | 1.5           | <b>8.3*</b> <sup>♀</sup>  | 1.0 (ref)         | -           | 1125 |
| Age                                                       | Ref     | Adult characteristics                          | Born before       | Late gestation  | Mid gestation | Early gestation           | Conceived after   | Mean (sd)   | n    |
| <b>68</b>                                                 | (76-78) | ICV (ml)                                       | 1138              | -               | -             | <b>1101*</b> <sup>♂</sup> | 1176              | 1138 (85)   | 52   |
|                                                           |         | BrainAGE score (years)                         | -1.81             | -               | -             | <b>2.53*</b> <sup>♂</sup> | 0.53              | -           | 52   |
|                                                           |         | Spatial Coefficient of Variance of a CBF image | 0.60              | -               | -             | <b>0.64*</b> <sup>♂</sup> | 0.59              | 0.61 (0.08) | 50   |
|                                                           | (79)    | Grip strength (kg)                             | 46.3 <sup>3</sup> | -               | -             | <b>42.1*</b>              | 46.3 <sup>3</sup> | -           | 67   |
|                                                           |         | Physical performance score (points)            | 9.7 <sup>3</sup>  | -               | -             | <b>8.9*</b>               | 9.7 <sup>3</sup>  | -           | 67   |
| <b>Transgenerational - F2 offspring of F1<sup>♀</sup></b> |         |                                                |                   |                 |               |                           |                   |             |      |

| Age                                     | Ref  | Adult characteristics                       | Born before         | Exposure to famine | Conceived after   | Mean (sd) | <i>n</i> |
|-----------------------------------------|------|---------------------------------------------|---------------------|--------------------|-------------------|-----------|----------|
| 33                                      | (54) | Birth weight (grams)                        | 3476                | 3484               | 3468              | -         | 856      |
|                                         |      | Ponderal index (kg/m <sup>3</sup> )         | 26.6                | <b>27.8*</b>       | 26.5              | -         | 856      |
|                                         |      | F2 poor health <sup>a</sup> (%)             | 16                  | 18                 | 14                | -         | 856      |
| Age                                     | Ref  | Adult characteristics                       | Unexposed to famine |                    | Exposed to famine | Mean (sd) | <i>n</i> |
| 35                                      | (75) | Adult weight (kg)                           | 78.9                |                    | 79.1              | 79.0      | 209      |
|                                         |      | Adult BMI <sup>1</sup> (kg/m <sup>2</sup> ) | 25.7                |                    | 25.0              | 25.3      | 209      |
| Transgenerational - F2 offspring of F1♂ |      |                                             |                     |                    |                   |           |          |
| Age                                     | Ref  | Adult characteristics                       | Born before         | Exposure to famine | Conceived after   | Mean (sd) | <i>n</i> |
| 30                                      | (54) | Birth weight (grams)                        | 3304                | 3298               | 856               | -         | 640      |
|                                         |      | Ponderal index (kg/m <sup>3</sup> )         | 25.9                | 25.9               | 26.3              | -         | 640      |
|                                         |      | F2 poor health <sup>a</sup> (%)             | 12                  | 12                 | 8                 | -         | 640      |
| Age                                     | Ref  | Adult characteristics                       | Unexposed to famine |                    | Exposed to famine | Mean (sd) | <i>n</i> |
| 35                                      | (75) | Adult weight (kg)                           | 73.5                |                    | <b>78.8*</b>      | 75.3      | 151      |
|                                         |      | Adult BMI <sup>1</sup> (kg/m <sup>2</sup> ) | 23.8                |                    | <b>25.2*</b>      | 24.3      | 151      |

LDL:HDL = Low Density Lipoprotein : High Density Lipoprotein, SBP = Systolic Blood Pressure, DBP = Diastolic Blood Pressure, BMI = Body Mass Index, FEV1/FVC = Forced Expiratory Volume / Forced Vital Capacity, HADS-A = Hospital Anxiety and Depression Scale - Anxiety subscale, HADS-D = Hospital Anxiety and Depression Scale - Depression subscale, ICV = Intracranial Volume, TBV = Total Brain Volume, CBF = Cerebral Blood Flow

<sup>1</sup>: Geometric means (SD)

<sup>2</sup>: Medians (IQR)

1  
2  
3   <sup>a</sup>: Congenital: asphyxia, developmental delay, Down syndrome, congenital heart disorders; cardiovascular and  
4   metabolic: diabetes, acquired cardiovascular conditions, obesity; psychiatric: schizophrenia, depression, suicide  
5   (attempt), drug/alcohol dependency; other: accidental, acquired neurological, autoimmune, respiratory,  
6   infectious, neoplastic, dermatological conditions.  
7

8   \*:  $p \leq 0.05$  compared to unexposed (born before and conceived after the famine)  
9

10   ♀ Measured both in men and women, results shown here only include sex-specific significant associations  
11   (women)  
12

13   ♂ Measured both in men and women, results shown here only include sex-specific significant associations (men)  
14  
15  
16  
17  
18  
19  
20  
21  
22  
23  
24  
25  
26  
27  
28  
29  
30  
31  
32  
33  
34  
35  
36  
37  
38  
39  
40  
41  
42  
43  
44  
45  
46  
47  
48  
49  
50  
51  
52  
53  
54  
55  
56  
57  
58  
59  
60

## Strengths and limitations

A strength of the Dutch famine birth cohort study is its quasi-experimental design. This design reduces the chance that associations between prenatal famine exposure and adult health outcomes are due to genetic inheritance of mother and child or socio-economic status, since exposure to famine was completely independent of maternal characteristics such as age or parity, socio-economic status and other environmental circumstances that may affect long-term health of their children. Nevertheless, exposed and unexposed individuals may have differed on other genetically inherited characteristics which we did not measure. The Dutch hunger winter families study is a different cohort study that used an approach with subtle differences to that of the Dutch famine birth cohort. This cohort was set up in 2003 to study adult health in individuals born in one of three institutions in famine-exposed cities (Amsterdam, Rotterdam, Leiden) to women who had been exposed to famine during or immediately preceding pregnancy. The Dutch hunger winter families study differed from the Dutch famine birth cohort study in one essential aspect: Controls were unexposed same-sex siblings and not unrelated time controls born before or conceived after the famine, to account for any potential genetic influences on later life health outcomes (86).

Another strength of our study design was that, due to the relatively short period of the famine, the exposed individuals are unlikely to substantially differ from unexposed individuals in terms of general socio-environmental conditions, indicating that famine exposure is one of the single remaining factors that can explain differences between both groups. Factors which we cannot control for are, firstly, the possible heightened levels of psychological and/or physical stress in women experiencing famine, which may have affected fetal development also, or, secondly, specific dietary changes that co-occurred at the time of the famine which may have impacted fetal development. Examples of the latter could include tulip bulb consumption.

1  
2  
3 A relative weakness of the cohort is possible selective conception and survival. During the  
4  
5 famine, fertility rates decreased by approximately 50%, due to increased amenorrhea among  
6  
7 women (18, 19). Also, perinatal mortality was higher during the famine (19, 87). Both the  
8  
9 decreased conception rates and increase in perinatal mortality during the famine may have led  
10  
11 to selective births of 'stronger' individuals. However, when we compared maternal  
12  
13 characteristics such as socio-economic status, age and parity between those who conceived  
14  
15 during the famine and those who gave birth before or conceived after the famine, we found no  
16  
17 major differences except that early exposed women were more frequently unmarried. An  
18  
19 increase in infant mortality of those with poorer health during the famine is also not likely to  
20  
21 explain our findings, as the majority of the associations between prenatal famine and adverse  
22  
23 health outcomes was observed in those conceived during the famine.  
24  
25  
26  
27  
28

29  
30 Another weakness of the study especially as the cohort grows older, is that more resilient  
31  
32 individuals may remain alive and in good health, in particular those who are motivated to  
33  
34 participate in the study. Selective attrition may have particularly affected the group of exposed  
35  
36 individuals, as we have shown that this group was particularly affected by famine exposure in  
37  
38 utero, reflected by more deaths (in women) and poorer health outcomes. This asymmetric loss  
39  
40 of adults with poorer health may have led to an under estimation of the true effects of prenatal  
41  
42 famine on adult health outcomes.  
43  
44  
45  
46  
47  
48  
49  
50  
51  
52  
53  
54  
55  
56  
57  
58  
59  
60



## Collaboration

The Dutch famine birth cohort study welcomes opportunities for collaboration; Enquiries should be directed to the Principal Investigator [t.j.roseboom@amsterdamumc.nl].

For peer review only

## Acknowledgements

We would like to thank the members of the Dutch famine birth cohort for their participation in our studies. We would also like to thank all researchers and other staff who have worked with us on study design, data collection, assessments, analyses and drafting of manuscript.

## Funding and competing interests

The Dutch famine birth cohort study has been funded by the Diabetes Fonds (Netherlands), the Netherlands Heart Foundation, The European Science Foundation (EUROSTRESS), the European Commission (Brainage, Dynahealth, Longitools), Wellbeing (UK), the Medical Research Council (UK), the Dutch Research Council (NWO Aspasia) and the Academic Medical Centre (Amsterdam, The Netherlands). We declare no conflict of interest.

## Data sharing statement

Data may be shared under a collaboration agreement. Please contact the Principal Investigator [t.j.roseboom@amsterdaumumc.nl] if you are interested in collaboration.

## Author Contributions

ACJR, RCP, SRdR and TJR contributed to parts of the development of methods and parts of the data collection. All authors were involved in data analysis and interpretation. LSB, SRdR and TJR drafted the work. All authors have critically revised this article and approved the final version to be published.

## References

1. Law CL, Shiell AW. Is blood pressure inversely related to birth weight? The strength of evidence from a systematic review of the literature. *J Hypertens*. 1996;14:935-41.
2. Davies AA, Smith GD, Ben-Shlomo Y, Litchfield P. Low birth weight is associated with higher adult total cholesterol concentration in men: findings from an occupational cohort of 25,843 employees. *Circulation*. 2004;110(10):1258-62.
3. Whincup PH, Kaye SJ, Owen CG, Huxley R, Cook DG, Anazawa S, et al. Birth weight and risk of type 2 diabetes: a systematic review. *JAMA*. 2008;300(24):2886-97.
4. Knop MR, Geng TT, Gorny AW, Ding R, Li C, Ley SH, et al. Birth Weight and Risk of Type 2 Diabetes Mellitus, Cardiovascular Disease, and Hypertension in Adults: A Meta-Analysis of 7 646 267 Participants From 135 Studies. *J Am Heart Ass*. 2018;7(23):e008870.
5. Osmond C, Barker DJ, Winter PD, Fall CH, Simmonds SJ. Early growth and death from cardiovascular disease in women. *BMJ*. 1993;307(6918):1519-24.
6. Barker DJP, Osmond C, Golding J, Kuh D, Wadsworth MEJ. Growth in utero, bloodpressure in childhood and adult life, and mortality from cardiovascular disease. *Br J Obstet Gynaecol*. 1989;298:564-7.
7. Risnes KR, Vatten LJ, Baker JL, Jameson K, Sovio U, Kajantie E, et al. Birthweight and mortality in adulthood: a systematic review and meta-analysis. *Int J Epidemiol*. 2011;40(3):647-61.
8. Barker DJP, Osmond C. Infant mortality, childhood nutrition and ischaemic heart disease in England and Wales. *Lancet*. 1986;10 May:1077-81.
9. Langley-Evans SC, Gardner DS, Welham SJ. Intrauterine programming of cardiovascular disease by maternal nutritional status. *Nutrition*. 1998;14(1):39-47.
10. Veenendaal MVE, Thangaratinam S, Yates D, Painter RC, de Rooij SR, van der Post JAM, et al. Is the Fetal Origins Hypothesis of Diabetes Supported by Animal Research? A Systematic Review and Meta-Analysis of the Evidence. *J Diabetes Metab*. 2013; 4:307.
11. Barker DJ. The origins of the developmental origins theory. *J Intern Med*. 2007;261(5):412-7.
12. Barker DJ, Gluckman PD, Godfrey KM, Harding JE, Owens JA, Robinson JS. Fetal nutrition and cardiovascular disease in adult life. *Lancet*. 1993;341(8850):938-41.
13. Nardoza LM, Caetano AC, Zamarian AC, Mazzola JB, Silva CP, Marcal VM, et al. Fetal growth restriction: current knowledge. *Arch Gynecol Obstet*. 2017;295(5):1061-77.
14. Dols MJ, Van Arcken DJ. Food supply and nutrition in the Netherlands during and immediately after World War II. *The Milbank Memorial Fund quarterly*. 1946;24(04):319-58.
15. Rijksarchief sG. Rijksbureau voor de Voedselvoorziening in Oorlogstijd. Verloop der rantsoenering van de gedistribueerde levensmiddelen voor verschillende leeftijdsgroepen periode 27 april 1941 - 1 October 1944. 1944.
16. Rijksarchief sG. Rijksbureau voor de Voedselvoorziening in Oorlogstijd. Overzichten per dag in de periode 1 October 1944 - 22 juli 1945 voor West-Nederland 1945.
17. Stare FJ. Nutritional conditions in Holland. 1945;3(8):225-7.
18. Burger GCE, Sandstead HR, Drummond JC. Malnutrition and Starvation in Western Netherlands, September 1944 to July 1945. Part I and II. In: Office THGSP, editor. 1948.
19. Stein Z, Susser M, Saenger G, Marolla F. Famine and human development: The Dutch hunger winter of 1944-1945. New York, NY, US: Oxford University Press; 1975.
20. Smith CA. Effects of maternal under nutrition upon the newborn infant in Holland (1944-1945). *J Pediatr*. 1947;30(3):229-43.
21. Sindram IS. De invloed van ondervoeding op de groei van de vrucht. *Ned Tijdschrift Verloskunde Gyneacologie*. 1953;53:30-48.
22. Stein Z, Susser M, Saenger G, Marolla F. Nutrition and mental performance. *Science*. 1972;178(4062):708-13.
23. Ravelli GP, Stein ZA, Susser MW. Obesity in young men after famine exposure in utero and early infancy. *N Engl J Med*. 1976;295(7):349-53.
24. Stein Z, Susser M. The Dutch famine, 1944-1945, and the reproductive process. I. Effects on six indices at birth. *Pediatr Res*. 1975;9(2):70-6.

- 1
- 2
- 3 25. Stein Z, Susser M. The Dutch famine, 1944-1945, and the reproductive process. II. Interrelations
- 4 of caloric rations and six indices at birth. *Pediatr Res*. 1975;9(2):76-83.
- 5 26. Susser ES, Lin SP. Schizophrenia after prenatal exposure to the Dutch Hunger Winter of 1944-
- 6 1945. *Arch Gen Psychiatry*. 1992;49(12):983-8.
- 7 27. Susser E, Neugebauer R, Hoek HW, Brown AS, Lin S, Labovitz D, et al. Schizophrenia after
- 8 prenatal famine. Further evidence. *Arch Gen Psychiatry* 1996;53(1):25-31.
- 9 28. Brown AS, van Os J, Driessens C, Hoek HW, Susser ES. Further evidence of relation between
- 10 prenatal famine and major affective disorder. *Am J Psychiatry*. 2000;157(2):190-5.
- 11 29. Brown AS, Susser ES, Lin SP, Neugebauer R, Gorman JM. Increased risk of affective disorders
- 12 in males after second trimester prenatal exposure to the Dutch hunger winter of 1944-45. *Br J*
- 13 *Psychiatry*. 1995;166(5):601-6.
- 14 30. Hoek HW, Brown AS, Susser E. The Dutch famine and schizophrenia spectrum disorders. *Soc*
- 15 *Psychiatry Ppsychiatr Epidemiol*. 1998;33(8):373-9.
- 16 31. Hoek HW, Susser E, Buck KA, Lumey LH, Lin SP, Gorman JM. Schizoid personality disorder
- 17 after prenatal exposure to famine. *Am J Psychiatry*. 1996;153(12):1637-9.
- 18 32. Neugebauer R, Hoek HW, Susser E. Prenatal exposure to wartime famine and development of
- 19 antisocial personality disorder in early adulthood. *JAMA*. 1999;282(5):455-62.
- 20 33. Stein AD, Lumey LH. The relationship between maternal and offspring birth weights after
- 21 maternal prenatal famine exposure: the Dutch Famine Birth Cohort Study. *Hum Biol*. 2000;72(4):641-
- 22 54.
- 23 34. Lumey LH, Ravelli AC, Wiessing LG, Koppe JG, Treffers PE, Stein ZA. The Dutch famine
- 24 birth cohort study: design, validation of exposure, and selected characteristics of subjects after 43 years
- 25 follow-up. *Paediatr Perinat Epidemiol*. 1993;7(4):354-67.
- 26 35. Ravelli AC, van der Meulen JH, Michels RP, Osmond C, Barker DJ, Hales CN, et al. Glucose
- 27 tolerance in adults after prenatal exposure to famine. *Lancet*. 1998;351(9097):173-7.
- 28 36. Ravelli AC. Prenatal exposure to the Dutch famine and glucose tolerance and obesity at age 50:
- 29 (AMC-UvA); 1999.
- 30 37. Roseboom TJ, Van Der Meulen JH, Ravelli AC, Osmond C, Barker DJ, Bleker OP. Perceived
- 31 health of adults after prenatal exposure to the Dutch famine. *Paediatr Perinat Epidemiol*.
- 32 2003;17(4):391-7.
- 33 38. Painter RC, Westendorp RGJ, de Rooij SR, Osmond C, Barker DJP, Roseboom TJ. Increased
- 34 reproductive success of women after prenatal undernutrition. *Hum Reprod*. 2008;23(11):2591-5.
- 35 39. Ravelli AC, van Der Meulen JH, Osmond C, Barker DJ, Bleker OP. Obesity at the age of 50 y
- 36 in men and women exposed to famine prenatally. *Am J Clin Nutr*. 1999;70(5):811-6.
- 37 40. Roseboom TJ, van der Meulen JH, Ravelli AC, van Montfrans GA, Osmond C, Barker DJ, et
- 38 al. Blood pressure in adults after prenatal exposure to famine. *J Hypertens*. 1999;17(3):325-30.
- 39 41. Roseboom TJ, van der Meulen JH, van Montfrans GA, Ravelli AC, Osmond C, Barker DJ, et
- 40 al. Maternal nutrition during gestation and blood pressure in later life. *J Hypertens*. 2001;19(1):29-34.
- 41 42. Roseboom TJ, van der Meulen JH, Osmond C, Barker DJ, Ravelli AC, Schroeder-Tanka JM, et
- 42 al. Coronary heart disease after prenatal exposure to the Dutch famine, 1944-45. *Heart*. 2000;84(6):595-
- 43 8.
- 44 43. Lopuhaä CE, Roseboom TJ, Osmond C, Barker DJ, Ravelli AC, Bleker OP, et al. Atopy, lung
- 45 function, and obstructive airways disease after prenatal exposure to famine. *Thorax*. 2000;55(7):555-61.
- 46 44. Painter RC, Roseboom TJ, van Montfrans GA, Bossuyt PM, Krediet RT, Osmond C, et al.
- 47 Microalbuminuria in adults after prenatal exposure to the Dutch famine. *J Am Soc Nephrol*.
- 48 2005;16(1):189-94.
- 49 45. Roseboom TJ, van der Meulen JH, Osmond C, Barker DJ, Ravelli AC, Bleker OP. Plasma lipid
- 50 profiles in adults after prenatal exposure to the Dutch famine. *Am J Clin Nutr*. 2000;72(5):1101-6.
- 51 46. Roseboom TJ, van der Meulen JH, Ravelli AC, Osmond C, Barker DJ, Bleker OP. Plasma
- 52 fibrinogen and factor VII concentrations in adults after prenatal exposure to famine. *Br J Haematol*.
- 53 2000;111(1):112-7.
- 54 47. Horenblas J, de Rooij SR, Roseboom TJ. The risk of stroke after prenatal exposure to famine. *J*
- 55 *Dev Orig Health Dis*. 2017;8(6):658-64.
- 56
- 57
- 58
- 59
- 60

- 1
- 2
- 3
- 4 48. Lussana F, Painter RC, Ocke MC, Buller HR, Bossuyt PM, Roseboom TJ. Prenatal exposure to
- 5 the Dutch famine is associated with a preference for fatty foods and a more atherogenic lipid profile.
- 6 *Am J Clin Nutr.* 2008;88(6):1648-52.
- 7 49. de Rooij SR, Painter RC, Phillips DI, Raikonen K, Schene AH, Roseboom TJ. Self-reported
- 8 depression and anxiety after prenatal famine exposure: mediation by cardio-metabolic pathology? *J Dev*
- 9 *Orig Health Dis.* 2011;2(3):136-43.
- 10 50. de Rooij SR, Painter RC, Swaab DF, Roseboom TJ. Sexual orientation and gender identity after
- 11 prenatal exposure to the Dutch famine. *Arch Sex Behav.* 2009;38(3):411-6.
- 12 51. Klooker TK, Braak B, Painter RC, de Rooij SR, van Elburg RM, van den Wijngaard RM, et al.
- 13 Exposure to severe wartime conditions in early life is associated with an increased risk of irritable bowel
- 14 syndrome: a population-based cohort study. *Am J Gastroenterol.* 2009;104(9):2250-6.
- 15 52. Painter RC, De Rooij SR, Bossuyt PM, Osmond C, Barker DJ, Bleker OP, et al. A possible link
- 16 between prenatal exposure to famine and breast cancer: a preliminary study. *Am J Human Biol.*
- 17 2006;18(6):853-6.
- 18 53. van Abeelen AFM, de Rooij SR, Osmond C, Painter RC, Veenendaal MVE, Bossuyt PMM, et
- 19 al. The sex-specific effects of famine on the association between placental size and later hypertension.
- 20 *Placenta.* 2011;32(9):694-8.
- 21 54. Painter RC, Osmond C, Gluckman P, Hanson M, Phillips DI, Roseboom TJ. Transgenerational
- 22 effects of prenatal exposure to the Dutch famine on neonatal adiposity and health in later life. *BJOG.*
- 23 2008;115(10):1243-9.
- 24 55. de Rooij SR, Painter RC, Roseboom TJ, Phillips DI, Osmond C, Barker DJ, et al. Glucose
- 25 tolerance at age 58 and the decline of glucose tolerance in comparison with age 50 in people prenatally
- 26 exposed to the Dutch famine. *Diabetologia.* 2006;49(4):637-43.
- 27 56. de Rooij SR, Painter RC, Phillips DI, Osmond C, Michels RP, Godsland IF, et al. Impaired
- 28 insulin secretion after prenatal exposure to the Dutch famine. *Diabetes Care.* 2006;29(8):1897-901.
- 29 57. de Rooij SR, Painter RC, Holleman F, Bossuyt PM, Roseboom TJ. The metabolic syndrome in
- 30 adults prenatally exposed to the Dutch famine. *Am J Clin Nutr.* 2007;86(4):1219-24.
- 31 58. Painter RC, de Rooij SR, Bossuyt PM, Simmers TA, Osmond C, Barker DJ, et al. Early onset
- 32 of coronary artery disease after prenatal exposure to the Dutch famine. *Am J Clin Nutr* 2006;84(2):322-7;
- 33 quiz 466-7.
- 34 59. de Rooij SR, Wouters H, Yonker JE, Painter RC, Roseboom TJ. Prenatal undernutrition and
- 35 cognitive function in late adulthood. *PNAS.* 2010;107(39):16881-6.
- 36 60. Painter RC, de Rooij SR, Hutten BA, Bossuyt PM, de Groot E, Osmond C, et al. Reduced intima
- 37 media thickness in adults after prenatal exposure to the Dutch famine. *Atherosclerosis.*
- 38 2007;193(2):421-7.
- 39 61. Painter RC, de Rooij SR, Bossuyt PM, de Groot E, Stok WJ, Osmond C, et al. Maternal nutrition
- 40 during gestation and carotid arterial compliance in the adult offspring: the Dutch famine birth cohort. *J*
- 41 *Hypertens.* 2007;25(3):533-40.
- 42 62. Veenendaal MVE, de Rooij SR, Painter RC, Robinson S, Osmond C, Sayer AA, et al. Grip
- 43 strength at age 58 after prenatal exposure to the Dutch famine. *J Aging Res Clin Pract.* 2012;1.
- 44 63. Painter RC, de Rooij SR, Bossuyt PM, Phillips DI, Osmond C, Barker DJ, et al. Blood pressure
- 45 response to psychological stressors in adults after prenatal exposure to the Dutch famine. *J Hypertens.*
- 46 2006;24(9):1771-8.
- 47 64. de Rooij SR, Painter RC, Phillips DI, Osmond C, Michels RP, Bossuyt PM, et al. Hypothalamic-
- 48 pituitary-adrenal axis activity in adults who were prenatally exposed to the Dutch famine. *Eur J*
- 49 *Endocrinol.* 2006;155(1):153-60.
- 50 65. de Rooij SR, Painter RC, Phillips DI, Osmond C, Tanck MW, Bossuyt PM, et al. Cortisol
- 51 responses to psychological stress in adults after prenatal exposure to the Dutch famine.
- 52 *Psychoneuroendocrinology.* 2006;31(10):1257-65.
- 53 66. de Rooij SR, Jones A, Phillips DI, Osmond C, Karemaker JM, Roseboom TJ, et al. Prenatal
- 54 Undernutrition and Autonomic Function in Adulthood. *Psychosom Med.* 2016;78(9):991-7.
- 55 67. de Rooij SR, Painter RC, Phillips DI, Osmond C, Tanck MW, Defesche JC, et al. The effects of
- 56 the Pro12Ala polymorphism of the peroxisome proliferator-activated receptor-gamma2 gene on
- 57 glucose/insulin metabolism interact with prenatal exposure to famine. *Diabetes Care.* 2006;29(5):1052-
- 58 7.
- 59
- 60



- 1  
2  
3 68. van Hoek M, Langendonk JG, de Rooij SR, Sijbrands EJ, Roseboom TJ. Genetic variant in the  
4 IGF2BP2 gene may interact with fetal malnutrition to affect glucose metabolism. *Diabetes*.  
5 2009;58(6):1440-4.
- 6 69. Botden IP, Zillikens MC, de Rooij SR, Langendonk JG, Danser AH, Sijbrands EJ, et al. Variants  
7 in the SIRT1 gene may affect diabetes risk in interaction with prenatal exposure to famine. *Diabetes*  
8 *Care*. 2012;35(2):424-6.
- 9 70. Veenendaal MV, Costello PM, Lillycrop KA, de Rooij SR, van der Post JA, Bossuyt PM, et al.  
10 Prenatal famine exposure, health in later life and promoter methylation of four candidate genes. *J Dev*  
11 *Orig Health Dis*. 2012;3(6):450-7.
- 12 71. Lussana F, de Rooij SR, Veenendaal M, Razzari C, Fontana G, Faioni EM, et al. Prevalence of  
13 factor V Leiden and G20210A prothrombin mutation in the Dutch Famine Birth Cohort: a possible  
14 survival advantage? *Thromb Haemost*. 2012;108(2):399-401.
- 15 72. Carroll D, Ginty AT, Painter RC, Roseboom TJ, Phillips AC, de Rooij SR. Systolic blood  
16 pressure reactions to acute stress are associated with future hypertension status in the Dutch Famine  
17 Birth Cohort Study. *Int J Psychophys*. 2012;85(2):270-3.
- 18 73. Ginty AT, Carroll D, Roseboom TJ, Phillips AC, de Rooij SR. Depression and anxiety are  
19 associated with a diagnosis of hypertension 5 years later in a cohort of late middle-aged men and women.  
20 *J Hum Hypertens*. 2013;27(3):187-90.
- 21 74. de Rooij SR, Veenendaal MV, Raikonen K, Roseboom TJ. Personality and stress appraisal in  
22 adults prenatally exposed to the Dutch famine. *Early Hum Dev*. 2012;88(5):321-5.
- 23 75. Veenendaal MV, Painter RC, de Rooij SR, Bossuyt PM, van der Post JA, Gluckman PD, et al.  
24 Transgenerational effects of prenatal exposure to the 1944-45 Dutch famine. *BJOG*. 2013;120(5):548-  
25 53.
- 26 76. de Rooij SR, Caan MW, Swaab DF, Nederveen AJ, Majoie CB, Schwab M, et al. Prenatal  
27 famine exposure has sex-specific effects on brain size. *Brain*. 2016;139(Pt 8):2136-42.
- 28 77. Franke K, Gaser C, Roseboom TJ, Schwab M, de Rooij SR. Premature brain aging in humans  
29 exposed to maternal nutrient restriction during early gestation. *NeuroImage*. 2018;173:460-71.
- 30 78. de Rooij SR, Mutsaerts H, Petr J, Asllani I, Caan MWA, Groot P, et al. Late-life brain perfusion  
31 after prenatal famine exposure. *Neurobiol Aging*. 2019;82:1-9.
- 32 79. Bleker LS, de Rooij SR, Painter RC, van der Velde N, Roseboom TJ. Prenatal Undernutrition  
33 and Physical Function and Frailty at the Age of 68 Years: The Dutch Famine Birth Cohort Study. *J*  
34 *Gerontol*. 2016;71(10):1306-14.
- 35 80. de Rooij SR, van Pelt AM, Ozanne SE, Korver CM, van Daalen SK, Painter RC, et al. Prenatal  
36 undernutrition and leukocyte telomere length in late adulthood: the Dutch famine birth cohort study. *Am*  
37 *J Clin Nutr*. 2015;102(3):655-60.
- 38 81. van Abeelen AF, Veenendaal MV, Painter RC, de Rooij SR, Dijkgraaf MG, Bossuyt PM, et al.  
39 Survival effects of prenatal famine exposure. *Am J Clin Nutr*. 2012;95(1):179-83.
- 40 82. Gasser B, Mauss Y, Ghnassia JP, Favre R, Kohler M, Yu O, et al. A quantitative study of normal  
41 nephrogenesis in the human fetus: its implication in the natural history of kidney changes due to low  
42 obstructive uropathies. *Fetal Diagn Ther*. 1993;8(6):371-84.
- 43 83. Stefan Y, Grasso S, Perrelet A, Orci L. A quantitative immunofluorescent study of the endocrine  
44 cell populations in the developing human pancreas. *Diabetes*. 1983;32(4):293-301.
- 45 84. Roseboom TJ, van der Meulen JH, Osmond C, Barker DJ, Ravelli AC, Bleker OP. Adult  
46 survival after prenatal exposure to the Dutch famine 1944--45. *Paediatr Perinat Epidemiol*.  
47 2001;15(3):220-5.
- 48 85. Painter RC, Roseboom TJ, Bossuyt PM, Osmond C, Barker DJ, Bleker OP. Adult mortality at  
49 age 57 after prenatal exposure to the Dutch famine. *Eur J Epidemiol*. 2005;20(8):673-6.
- 50 86. Lumey LH, Susser ES, Stein AD, Kahn HS, van der Pal-de Bruin KM, Blauw GJ, et al. Cohort  
51 Profile: The Dutch Hunger Winter Families Study. *Int J Epidemiol*. 2007;36(6):1196-204.
- 52 87. Susser M, Stein Z. Timing in prenatal nutrition: a reprise of the Dutch Famine Study. *Nutr Rev*.  
53 1994;52(3):84-94.
- 54  
55  
56  
57  
58  
59  
60

1  
2  
3  
4  
5  
6  
7  
8  
9  
10  
11  
12  
13  
14  
15  
16  
17  
18  
19  
20  
21  
22  
23  
24  
25  
26  
27  
28  
29  
30  
31  
32  
33  
34  
35  
36  
37  
38  
39  
40  
41  
42  
43  
44  
45  
46  
47  
48  
49  
50  
51  
52  
53  
54  
55  
56  
57  
58  
59  
60

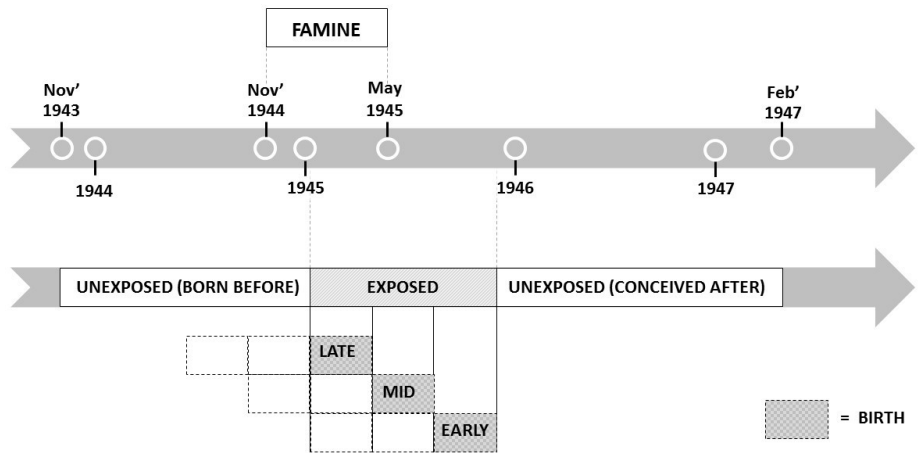

Figure 1. Dutch famine birth cohort schematic presentation of gestational famine exposure.

338x190mm (96 x 96 DPI)

# BMJ Open

## Cohort Profile: The Dutch famine birth cohort (DFBC), a prospective birth cohort study in the Netherlands

|                                 |                                                                                                                                                                                                                                                                                                                                                                                                                                 |
|---------------------------------|---------------------------------------------------------------------------------------------------------------------------------------------------------------------------------------------------------------------------------------------------------------------------------------------------------------------------------------------------------------------------------------------------------------------------------|
| Journal:                        | <i>BMJ Open</i>                                                                                                                                                                                                                                                                                                                                                                                                                 |
| Manuscript ID                   | bmjopen-2020-042078.R1                                                                                                                                                                                                                                                                                                                                                                                                          |
| Article Type:                   | Cohort profile                                                                                                                                                                                                                                                                                                                                                                                                                  |
| Date Submitted by the Author:   | 21-Dec-2020                                                                                                                                                                                                                                                                                                                                                                                                                     |
| Complete List of Authors:       | Bleker, Laura ; Amsterdam UMC Location AMC, Epidemiology and Data Science<br>de Rooij, Susanne; Amsterdam UMC Location AMC, Epidemiology and Data Science<br>Painter, Rebecca; Amsterdam UMC Location AMC, Obstetrics & Gynaecology<br>Ravelli, Anita C.J.; Amsterdam UMC Location AMC, Medical Informatics<br>Roseboom, Tessa; Amsterdam UMC Location AMC, Clinical Epidemiology and Biostatistics; Obstetrics and Gynaecology |
| <b>Primary Subject Heading</b>: | Epidemiology                                                                                                                                                                                                                                                                                                                                                                                                                    |
| Secondary Subject Heading:      | Nutrition and metabolism, Obstetrics and gynaecology, Public health                                                                                                                                                                                                                                                                                                                                                             |
| Keywords:                       | EPIDEMIOLOGY, NUTRITION & DIETETICS, PUBLIC HEALTH                                                                                                                                                                                                                                                                                                                                                                              |
|                                 |                                                                                                                                                                                                                                                                                                                                                                                                                                 |

SCHOLARONE™  
Manuscripts





I, the Submitting Author has the right to grant and does grant on behalf of all authors of the Work (as defined in the below author licence), an exclusive licence and/or a non-exclusive licence for contributions from authors who are: i) UK Crown employees; ii) where BMJ has agreed a CC-BY licence shall apply, and/or iii) in accordance with the terms applicable for US Federal Government officers or employees acting as part of their official duties; on a worldwide, perpetual, irrevocable, royalty-free basis to BMJ Publishing Group Ltd ("BMJ") its licensees and where the relevant Journal is co-owned by BMJ to the co-owners of the Journal, to publish the Work in this journal and any other BMJ products and to exploit all rights, as set out in our [licence](#).

The Submitting Author accepts and understands that any supply made under these terms is made by BMJ to the Submitting Author unless you are acting as an employee on behalf of your employer or a postgraduate student of an affiliated institution which is paying any applicable article publishing charge ("APC") for Open Access articles. Where the Submitting Author wishes to make the Work available on an Open Access basis (and intends to pay the relevant APC), the terms of reuse of such Open Access shall be governed by a Creative Commons licence – details of these licences and which [Creative Commons](#) licence will apply to this Work are set out in our licence referred to above.

Other than as permitted in any relevant BMJ Author's Self Archiving Policies, I confirm this Work has not been accepted for publication elsewhere, is not being considered for publication elsewhere and does not duplicate material already published. I confirm all authors consent to publication of this Work and authorise the granting of this licence.

1  
2  
3 **Cohort Profile: The Dutch famine birth cohort (DFBC), a prospective birth cohort study in the**  
4 **Netherlands**  
5

6  
7 Laura S. Bleker<sup>1</sup>, Susanne R. de Rooij<sup>1\*</sup>, Rebecca C. Painter<sup>2</sup>, Anita C.J. Ravelli<sup>2-3</sup>, Tessa J. Roseboom<sup>1-2</sup>  
8  
9

10 <sup>1</sup>Department of Epidemiology and Data Science, Amsterdam UMC, University of Amsterdam, The  
11 Netherlands  
12

13  
14  
15 <sup>2</sup>Department of Obstetrics and Gynecology, Amsterdam UMC, University of Amsterdam, The  
16 Netherlands  
17

18  
19 <sup>3</sup>Department of Medical Informatics, Amsterdam UMC, University of Amsterdam, The Netherlands  
20  
21  
22  
23  
24

25 \*Corresponding author:

26  
27 Dept. Epidemiology and Data Science, Amsterdam UMC, University of Amsterdam

28  
29 Meibergdreef 9, 1105 AZ Amsterdam, The Netherlands

30  
31 Email: s. r.derooij@amsterdamumc.nl

32  
33  
34 Tel nr: \*\*31 20 56 64660  
35  
36  
37  
38  
39

40 Word count: 4442  
41  
42  
43  
44  
45  
46  
47  
48  
49  
50  
51  
52  
53  
54  
55  
56  
57  
58  
59  
60

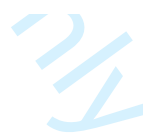

## Abstract

**Purpose:** The Dutch famine birth cohort study was set up to investigate the effects of acute maternal undernutrition of the 1944-1945 Dutch famine during specific stages of gestation on later health, with a particular focus on chronic cardiovascular and metabolic diseases, ageing and mental health.

**Participants:** The Dutch famine birth cohort consists of 2414 singletons born alive and at term in the Wilhelmina Gasthuis in Amsterdam around the time of the Dutch famine (1943-1947) whose birth records have been kept. The cohort has been traced and studied since 1994, when the first data collection started. The cohort has been interviewed and physically examined in several waves of data collection since that time, allowing repeated measures of a wide range of phenotypic information as well as the collection of biological samples (blood, urine, buccal swabs), functional testing (of heart, lungs, kidney, HPA axis) and imaging of the brain (MRI) and vasculature (ultrasound). Additionally, genetic and epigenetic information was collected. Through linkage with registries, mortality and morbidity information of the entire cohort has been obtained.

**Findings to date:** Prenatal famine exposure had lasting consequences for health in later life. The effects of famine depended on its timing during gestation and the organs and tissues developing at that time, with most effects after exposure to famine in early gestation. The effects of famine were widespread and affected the structure and function of many organs and tissues, resulted in altered behaviour and increased risks of chronic degenerative diseases, and increased mortality. The effects of famine were independent of size at birth, which suggests that programming may occur without altering size at birth.

**Future plans:** As the cohort ages, we will be assessing the effects of prenatal undernutrition on (brain) ageing, cognitive decline and dementia, as well as overall morbidity and mortality.

**Strengths and Limitations:**

- The quasi-experimental design of the study provides a unique opportunity to investigate effects of undernutrition in pregnancy that would not be ethically possible to study otherwise
- The long period of follow up allows for unusually long term consequences to be investigated decades after the exposure of interest.
- A limitation is the relatively small size of the cohort limiting the statistical power to investigate effects of prenatal famine exposure on outcomes that are rare.
- Selective survival and participation may have introduced bias in the studies which included physical examinations or measurements, but linkage to registries give insight into the degree of selection that has occurred.
- No information is available on the time period between discharge from the hospital after birth and age 50 when the cohort was first traced, leaving limitations for adjusting for potential confounders that may have had an influence during this period.

**Registration:** The Dutch famine birth cohort is not linked to a clinical trial.

**Keywords :** Dutch famine, undernutrition, pregnancy, fetal programming, cardiovascular disease, metabolic disease, brain, ageing

## Introduction

### *Study rationale*

The Dutch famine birth cohort study is a historical birth cohort of men and women born around the time of the 1944-1945 Dutch famine in the Wilhelmina Gasthuis in Amsterdam, the Netherlands. The study was set up to investigate the effects of prenatal exposure to the Dutch famine on adult health in order to semi-experimentally test the developmental origins of adult disease hypothesis in a human setting. Based on this hypothesis we expected increased rates of chronic diseases such as type 2 diabetes and cardiovascular disease among those who had been exposed to the Dutch famine prenatally.

This paper describes the rationale for the Dutch famine birth cohort study, why it was set up, how it was set up, and which unique features of the Dutch famine provided the opportunity to semi-experimentally investigate effects of undernutrition in a human setting and allow for the long term consequences to be investigated decades later. We provide an overview of the studies that have been done in the cohort so far, the findings of 25 years of research in this cohort and which insights they provided as well as the implications these insights might have.

### *The developmental origins of health and disease*

Epidemiological studies in populations across the globe have consistently shown that small size at birth is associated with increased risks of chronic degenerative diseases and their biological risk factors such as hypertension, type 2 diabetes and cardiovascular disease [1-6]. The initial observations led to the hypothesis that undernutrition during critical periods of gestation would lead to alterations in the structure and function of organs and tissues developing at the time, resulting in reduced size at birth as well as an increased risk of disease in later life [7,8]. In experimental studies in animals, undernutrition during pregnancy induced cardiovascular and metabolic changes in the

1  
2  
3 adult offspring leading to increased rates of disease and reduced lifespan .[9-11] Experimentally  
4  
5 investigating the long term effects of undernutrition during gestation in humans would not be ethical  
6  
7 nor practically feasible.  
8  
9

### 10 11 **The unique setting of the Dutch famine to semi-experimentally investigate effects of** 12 13 **undernutrition in humans**

14  
15  
16 The tragic circumstances of the Dutch famine of 1944–1945 created a unique opportunity to assess  
17  
18 the effects of prenatal undernutrition on human health in later life. During World War II, part of the  
19  
20 Dutch population was exposed to famine during the severe ‘hunger winter’ of 1944-1945. This  
21  
22 historical tragedy has provided the unique opportunity to study short and long-term effects of  
23  
24 famine exposure during intrauterine development. The Dutch famine can be viewed as a ‘natural  
25  
26 experiment’, because of its sudden onset and end in a previously well-nourished population. The  
27  
28 famine was acute, relatively short, and had an impact on the entire population within the affected  
29  
30 regions, minimizing confounding by genetic inheritance or other simultaneously occurring risk  
31  
32 factors, such as socio-economic status. Also, throughout the famine, food rations were precisely  
33  
34 registered.  
35  
36  
37  
38  
39

### 40 ***Historical events leading to the Dutch famine***

41  
42  
43 In 1944-1945, the Dutch famine hit the western parts of the Netherlands towards the end of World  
44  
45 War II, only months before its liberation from the German occupier by the Allied forces. Before the  
46  
47 war, nutritional standards of the Dutch population were generally adequate.[12] On the 10<sup>th</sup> of May  
48  
49 1940, the Netherlands were invaded by German forces, with immediate impact on the Dutch food  
50  
51 supply. Food imports from other countries, including the Dutch colonies, were no longer possible,  
52  
53 and part of the food produced in the Netherlands was sent to Germany.[12] The National Bureau for  
54  
55 Food Distribution had already implemented food rationing and distribution prior to the invasion, and  
56  
57 was fully operative throughout the entire country by the end of April 1941. The food rations were  
58  
59  
60

1  
2  
3 determined weekly and recorded in detail. However, daily rations remained calorically and  
4  
5 nutritionally adequate until September 1944, when they suddenly dropped below 1600  
6  
7 calories.[13,14] On the 17<sup>th</sup> of September 1944, the Dutch exiled government requested a railroad  
8  
9 strike to support the advance of the Allied forces, which by that time had already liberated the  
10  
11 southern part of the Netherlands. The German occupier responded by an abrupt ban of food  
12  
13 transports to the western part of the Netherlands. By November 1944, food stocks in the large cities  
14  
15 in the west of the Netherlands had been exhausted, and the ban was partly lifted to allow food  
16  
17 transport across water. However, due to an early and exceptionally harsh winter, waterways and  
18  
19 canals had frozen over. Food stocks could no longer be replenished and famine set in for the  
20  
21 inhabitants of the large cities in the west, including Amsterdam, Rotterdam and The Hague. The  
22  
23 official daily rations per person dropped to below 1000 calories in November 1944 and varied  
24  
25 between 400 and 800 calories in the following six months, a period that would later be referred to as  
26  
27 the “Hunger Winter”. Children aged 1 year or younger were relatively protected, as their official daily  
28  
29 ration never dropped below 1000 calories. Although this initially also applied to pregnant and  
30  
31 lactating women, this was no longer possible as the food scarcity persisted. On the fifth of May 1945,  
32  
33 the western parts of the Netherlands were liberated by The Allied Forces. Within a week, daily  
34  
35 rations had rapidly risen above 1000 calories, through supplements by airdrops and the Special Red  
36  
37 Cross Feeding Team.[15] By June 1945, rations had risen above 2000 calories. Within weeks, the pre-  
38  
39 famine nutritional standards were re-established, and were maintained until the food ration was  
40  
41 permanently lifted, 5 years after the war in 1950.[16,17]  
42  
43  
44  
45  
46  
47  
48  
49

### 50 **Studies of the Dutch famine**

51  
52 Soon after the war ended, researchers realised the unique setting the Dutch famine had  
53  
54 unintentionally created to semi-experimentally investigate effects of famine exposure in pregnancy  
55  
56 on offspring’s health. Since, several research groups have investigated the long-term consequences  
57  
58 of prenatal exposure to the Dutch famine. These studies have used a variety of different designs;  
59  
60

1  
2  
3 register studies have linked date and place of birth to various outcomes, data from recruitment tests  
4  
5 of military conscripts have shown links between prenatal famine exposure (based on time and place  
6  
7 of birth) and IQ, mental health and BMI, and birth records have been used to set up cohorts  
8  
9 comparing those exposed to famine prenatally with their unexposed same-sex siblings, or to those  
10  
11 born in the same hospital either before the famine or conceived after it. Some of the earliest studies  
12  
13 on the Dutch famine were published within a few years after World War II by Smith and Sindram, and  
14  
15 showed that babies born during the famine were lighter at birth .[18,19]  
16  
17  
18  
19

20 In the 70's, data from 19-year old Dutch military conscripts was used to investigate effects of  
21  
22 prenatal famine exposure on Intelligence Quotient [17] and BMI, showing no effects on intelligence  
23  
24 but an increased prevalence of obesity among military conscripts who were exposed to famine  
25  
26 during early gestation.[20,21]  
27  
28  
29

30 Using the Dutch Psychiatry Registry, increased rates of schizophrenia,[22,23, and affective disorders  
31  
32 [24,25] were observed in those prenatally exposed to famine. Refined analyses of the military  
33  
34 conscripts data, later confirmed these findings and showed higher rates for schizophrenia [26], a  
35  
36 schizoid personality [27] and antisocial personality disorder,[28] in men who had been exposed to  
37  
38 the Dutch famine prenatally.  
39  
40  
41

42 Barkers findings of links between small size at birth and later cardiovascular and metabolic disease  
43  
44 and the hypothesis that fetal undernutrition would underlie this association [29] led to a  
45  
46 collaborative effort between the Academic Medical Center in Amsterdam (the successor of the  
47  
48 Wilhelmina Gasthuis that had kept birth records of babies born around the time of the famine) and  
49  
50 the Medical Research Council (MRC) Environmental Epidemiology Unit in Southampton, UK, led by  
51  
52 Barker, to set up the Dutch famine birth cohort study.  
53  
54  
55  
56  
57  
58  
59  
60



## Cohort description

### *Eligibility*

In 1994, the Dutch famine birth cohort was set up in the Academic Medical Centre in Amsterdam, the Netherlands. All men and women born as term singletons between November 1, 1943 and February 28, 1947 in the Wilhelmina Gasthuis (WG) in Amsterdam were eligible candidates to be included in the Dutch famine birth cohort. The WG was the main maternity hospital in Amsterdam at the time of the famine and birth records were still kept at the city archive of Amsterdam.[30] Only live born singletons after a full-term pregnancy were included ( $\geq 259$  days gestational age, calculated either from the date of the last menstrual period or by the obstetrician's estimation at first prenatal visit and at physical examination of the child at birth) in order to exclude the potential confounding effects of prematurity or twinning on later health.

### *Study participants*

The birth ledgers, which contained general information on date of birth, name of the parents and identification number were retrieved from the Obstetrics department of the Academic Medical Center (the former WG) in Amsterdam of individuals born between November 1, 1943 and February 28, 1947. From the 5425 records, all individuals exposed to famine, according to our definition (see below), were considered eligible exposed candidates. A random sample of eligible individuals unexposed to famine during gestation (born before the famine or conceived after the famine) was taken. Twins and stillbirths were excluded. This resulted in 2680 eligible candidates for which the detailed medical records were searched and coded in all detail in the city archive of Amsterdam. Of these 2680 individuals, 27 individuals (1.0%) were excluded because their medical records were missing or incomplete, and 239 individuals (8.9%) were excluded based on their preterm birth ( $< 259$  days gestational age). Ultimately, 2414 people were considered eligible (821 live born term

1  
2  
3 singletons exposed to famine prenatally, 764 live born term singletons born before the famine and  
4  
5 829 live born term singletons conceived after the famine).

### 8 9 ***Exposure to famine***

10  
11  
12 Exposure to famine during gestation was defined as an average maternal daily ration of less than  
13  
14 1000 calories during any 13-week period of gestation.[31] According to the official daily rations of the  
15  
16 general population, children born in Amsterdam between January 7, 1945 and December 8, 1945,  
17  
18 were considered to be exposed to famine during prenatal life. Three 16-week periods were  
19  
20 distinguished; children who were mainly exposed during **late** gestation (born between January 7 and  
21  
22 April 28, 1945), **mid** gestation (born between April 29 and August 18, 1945) or **early** gestation (born  
23  
24 between August 19 and December 8, 1945). A sample of the individuals born within one year before  
25  
26 the famine or conceived up to one year after the end of the famine were eligible for controls as  
27  
28 comparisons. Being unexposed to famine was defined as being born before the famine (born  
29  
30 between November 1, 1943 and January 7, 1945), or conceived after the famine (born between  
31  
32 December 9, 1945 and February 28, 1947) (Figure 1).  
33  
34  
35  
36  
37  
38  
39  
40  
41  
42  
43

### 44 ***Maternal and birth characteristics***

45  
46  
47 Medical records contained information on maternal characteristics including maternal weight and  
48  
49 blood pressure throughout pregnancy as well as a detailed description of delivery and the  
50  
51 postpartum period.  
52  
53

54  
55  
56 Maternal characteristics included maternal age, marital status, reproductive and medical history, and  
57  
58 occupation of the head of the family. Blood pressure and maternal weight were measured at every  
59  
60

1  
2  
3 prenatal visit. Pelvic measurements were taken, including the interspinous distance (the distance  
4 between the anterior superior iliac spines). Maternal weight gain in the third trimester was  
5 estimated as the difference between the woman's weight as close as possible to the start of the  
6 third trimester and her weight at the last prenatal visit (always within 2 weeks of birth), multiplied by  
7 the ratio of trimester duration (13 weeks) and the time interval between the two weight  
8 measurements.  
9

10  
11 Birth characteristics included date of birth, sex, birth weight, and birth length (crown-to-heel). Head  
12 circumference was calculated by:  $\pi * (\text{biparietal diameter} + \text{occipitofrontal diameter}) * 0.5$ . Ponderal  
13 index was calculated by:  $\text{birth weight} / (\text{crown-to-heel}^2)$ . Placental area was calculated by:  $\pi * \text{placental length} * \text{placental width} * 0.25$ . At discharge, infant weight and type of feeding (exclusive  
14 breastfeeding/exclusive bottle-feeding/a combination) were recorded. Besides information from the  
15 medical records for each women the profession of the father / the head of the family was collected  
16 using the hospital admission "crib cards" and coded as manual or non-manual work. Table 1 shows  
17 the maternal and birth characteristics of the cohort according to the timing of exposure to famine.  
18  
19  
20  
21  
22  
23  
24  
25  
26  
27  
28  
29  
30  
31  
32  
33  
34  
35  
36  
37  
38  
39

#### 40 **Follow-up**

41  
42 In 1994, current addresses of the children born before, during and after the famine were requested  
43 from the population registry (Bevolkingsregister) in Amsterdam, which traced 2155 of the 2414  
44 eligible participants. Of these, 265 persons had died, 199 had emigrated, and another 164 refused to  
45 share their address, resulting in 1527 (63.3%) of 2155 cases. Power calculations for a study sample to  
46 be invited for interviewing and clinical measurements were based on the 120-min glucose  
47 concentrations after a 75 gram oral glucose load as the main outcome variable, based on pooled data  
48 from three previous MRC Southampton studies which had established a link between birth weight  
49 and glucose tolerance in adulthood (Hertfordshire, Preston and Sheffield).[32] To detect an increase  
50  
51  
52  
53  
54  
55  
56  
57  
58  
59  
60

1  
2  
3 of 10% in the 120-minute glucose concentration, a sample size of 700 men and women (450  
4 prenatally exposed and 250 unexposed persons) was needed for 93% power and a 5% type 1 error  
5 probability (two-sided). A 70% participation rate for the oral glucose load test was assumed and  
6 based on this, interviews with 1000 men and women at their homes were planned. We invited all  
7 people in each of the 5 exposure/non-exposure groups, starting with those who lived in, or close to,  
8 Amsterdam (n=1018) to participate in the first study, of whom 912 (90%) agreed to be interviewed at  
9 their homes and 741 (81%) of the interviewed participants visited the clinic for measurements.[31]

10  
11  
12  
13  
14  
15  
16  
17  
18  
19  
20 Data collection of the Dutch famine birth cohort study has occurred in six study waves from 1994/6  
21 until 2020, with a seventh wave planned in 2021 (See Figure 2 for an overview of study waves).  
22 Measurements consisted of a home interview at age 50 and a hospital visit around the ages of 50  
23 (wave I, 1994 - 1996), 58 (wave II, 2002-2004), 63 (wave III, 2008-2009), 68 (wave IV, 2012-2013),  
24 and 74 (wave VI, 2019-2020) and completion of a questionnaire by the participants at age 73 (wave  
25 V, 2018). . At wave V in 2018, 1207 of the 1527 participants were still living in the Netherlands with  
26 known addresses (79%), of which 595 agreed to participate (49%). The fourth and sixth waves  
27 occurred in subsamples of the cohort. Ethical approvals for the study have been provided by the  
28 Ethics Committee of the Academic Medical Center Amsterdam and have been registered under the  
29 numbers: MEC 01 / 215, MEC 08 / 26, MEC 2011/ 305, W17\_025 and MEC 2019 / 017.

### 30 31 32 33 34 35 36 37 38 39 40 41 42 43 44 45 46 47 **Measurements**

48  
49  
50 Table 2 gives a summary of the study waves, including the mean ages of the famine exposed  
51 participants during that wave, with outcome measures and a description of participation rates.  
52 Outcome measures were compared between those exposed to famine in early, mid or late gestation  
53 to those prenatally unexposed to famine, mostly by applying regression models with exposures as  
54 dummy variables.  
55  
56  
57  
58  
59  
60

1  
2  
3 ***Patient and Public Involvement statement***  
4  
5

6 Cohort members are informed about study aims and outcomes via newsletters and the studies  
7 website [www.hongerwinter.nl](http://www.hongerwinter.nl). Cohort members have not been involved in setting up research  
8 questions and data collection, study design, recruitment strategies, assessment of study burden and  
9 dissemination of study results.  
10  
11  
12  
13  
14  
15  
16  
17  
18  
19  
20  
21  
22  
23  
24  
25  
26  
27  
28  
29  
30  
31  
32  
33  
34  
35  
36  
37  
38  
39  
40  
41  
42  
43  
44  
45  
46  
47  
48  
49  
50  
51  
52  
53  
54  
55  
56  
57  
58  
59  
60

For peer review only

**Table 1.** Maternal characteristics and birth outcomes of 2414 singleton children born alive and at term in the Wilhelmina Gasthuis in Amsterdam between 1 November 1943 and 28 February 1947.

|                                          | Exposure to Famine      |                            |                           |                             |                             | Total<br>(SD)   | Missing<br>(n) |
|------------------------------------------|-------------------------|----------------------------|---------------------------|-----------------------------|-----------------------------|-----------------|----------------|
|                                          | Born<br>before<br>n=764 | Late<br>gestation<br>n=307 | Mid<br>gestation<br>n=297 | Early<br>gestation<br>n=217 | Conceived<br>after<br>n=829 | n=2414          |                |
| <b>Maternal characteristics</b>          |                         |                            |                           |                             |                             |                 |                |
| Age (years)                              | 28.5                    | 30.0                       | 28.1                      | 27.7                        | 28.0                        | 28.3 (6.4)      | 0              |
| Never<br>married (%)                     | 13.2                    | 9.8                        | 20.2                      | 25.8                        | 16.3                        | 15.8            | 0              |
| Weight gain<br>third trim.<br>(kg)       | 3.1                     | 0.0                        | 4.9                       | 5.7                         | 4.2                         | 3.5 (3.2)       | 732            |
| Weight at last<br>prenatal visit<br>(kg) | 66.7                    | 61.8                       | 63.5                      | 67.9                        | 69.1                        | 66.6 (8.7)      | 281            |
| Interspinal<br>distance (cm)             | 26.1                    | 25.8                       | 25.5                      | 25.8                        | 26.3                        | 26.0 (1.8)      | 14             |
| <b>Birth outcomes</b>                    |                         |                            |                           |                             |                             |                 |                |
|                                          | Born<br>before<br>n=764 | Late<br>gestation<br>n=307 | Mid<br>gestation<br>n=297 | Early<br>gestation<br>n=217 | Conceived<br>after<br>=829  | Total<br>n=2414 |                |
| Boys (%)                                 | 53.1                    | 48.2                       | 48.5                      | 49.8                        | 52.5                        | 51.4            |                |
| First born (%)                           | 39.7                    | 29.6                       | 36.7                      | 39.2                        | 39.3                        | 37.9            |                |

|                                     |      |      |      |      |      |            |     |
|-------------------------------------|------|------|------|------|------|------------|-----|
| Pregnancy duration (days)           | 285  | 283  | 285  | 287  | 286  | 285 (11)   | 371 |
| Birth weight (g)                    | 3373 | 3133 | 3217 | 3470 | 3413 | 3346 (478) | 0   |
| Body length (cm)                    | 50.5 | 49.4 | 49.8 | 50.9 | 50.5 | 50.3 (2.2) | 32  |
| Ponderal index (kg/m <sup>3</sup> ) | 26.1 | 25.8 | 26.0 | 26.2 | 26.5 | 26.4 (2.4) | 32  |
| Head circumference (cm)             | 32.9 | 32.3 | 32.1 | 32.8 | 33.2 | 32.8 (2.4) | 17  |
| Placental diameter (cm)             | 20.6 | 19.7 | 20.0 | 19.9 | 20.2 | 20.2 (2.5) | 357 |

\*Adapted from Table 1, Page 59, Ravelli et al. [33]

**Table 2.** Dutch famine birth cohort study waves, including the mean ages of the participants at examination, the outcome measures and a description of attrition rates.

| Phase                            | Measurement                                                                                                                                                                                                                                                                                                                                                                                                                                                                                                                                                                                                                          | Loss of follow-up                                                                                                                                                                                                                                                              |
|----------------------------------|--------------------------------------------------------------------------------------------------------------------------------------------------------------------------------------------------------------------------------------------------------------------------------------------------------------------------------------------------------------------------------------------------------------------------------------------------------------------------------------------------------------------------------------------------------------------------------------------------------------------------------------|--------------------------------------------------------------------------------------------------------------------------------------------------------------------------------------------------------------------------------------------------------------------------------|
| Wave I<br>1994-1996              | Wave 1a birth data collection/ exposure definition/ mortality status                                                                                                                                                                                                                                                                                                                                                                                                                                                                                                                                                                 |                                                                                                                                                                                                                                                                                |
| Wave I<br>(Age 50)<br>1994– 1996 | <p><b>Wave Ib (home interview)</b></p> <ul style="list-style-type: none"> <li>- Questionnaires (General information, medical information, life style factors, physical activity, weight history, reproductive history, EPIC Food frequency questionnaire, self-perceived health and medication use) [34,35]</li> <li>- Anthropometrics [36]</li> <li>- Blood pressure [37,38]</li> </ul> <p><b>Wave Ic (hospital visit)</b></p> <ul style="list-style-type: none"> <li>- Blood pressure [37,38]</li> <li>- Glucose tolerance test [31]</li> <li>- ECG [39]</li> <li>- Lung function [40]</li> <li>- Urine collection [41]</li> </ul> | 912 (90%) of the 1018 selected participants were interviewed at their homes (Wave Ib), 741 (81%) agreed to visit the AMC clinic (Wave Ic). There were no differences in the mean birth weight of the 741 who attended the clinic and the 2414 children in the original cohort. |



1  
2  
3  
4  
5  
6  
7  
8  
9  
10  
11  
12  
13  
14  
15  
16  
17  
18  
19  
20  
21  
22  
23  
24  
25  
26  
27  
28  
29  
30  
31  
32  
33  
34  
35  
36  
37  
38  
39  
40  
41  
42  
43  
44  
45  
46

|                                                 |                                                                                                                                                                                                                                                                                                                                                                                                                                                                                                                                                                                                                                                                                                                                                                         |                                                                                                                                                    |
|-------------------------------------------------|-------------------------------------------------------------------------------------------------------------------------------------------------------------------------------------------------------------------------------------------------------------------------------------------------------------------------------------------------------------------------------------------------------------------------------------------------------------------------------------------------------------------------------------------------------------------------------------------------------------------------------------------------------------------------------------------------------------------------------------------------------------------------|----------------------------------------------------------------------------------------------------------------------------------------------------|
|                                                 | <ul style="list-style-type: none"> <li>- Lipid profile and clotting factors [42,43]</li> </ul>                                                                                                                                                                                                                                                                                                                                                                                                                                                                                                                                                                                                                                                                          |                                                                                                                                                    |
| <b>Wave II</b><br><br>(Age 58)<br><br>2002-2004 | <b>Wave IIa (hospital visit)</b> <ul style="list-style-type: none"> <li>- Questionnaires (General information, medical information, lifestyle factors, physical activity, weight history reproductive history, transgenerational effects, self-perceived health and medication use) [44-51]</li> <li>- Glucose tolerance test [52,53]</li> <li>- Anthropometrics</li> <li>- Blood pressure</li> <li>- ECG [54]</li> <li>- Urine collection [41]</li> <li>- Cognitive function [55]</li> <li>- Ultrasound examinations of the arterial walls of the carotid and femoral arteries [56,57]</li> <li>- Physical function [58]</li> <li>- Psychological Stress tests [59-61]</li> <li>- Genomic DNA from blood plasma [62-66]</li> </ul><br><b>Wave IIb (hospital visit)</b> | 860 (60%) of 1423 eligible candidates agreed to participate. There were no differences in mean birth weight between responders and non-responders. |

|                                                          |                                                                                                                                                                                                                                                                                                                                                                                                                                                                                                                                                |                                                                                                                                                                                                                                                                                                                                                                                                         |
|----------------------------------------------------------|------------------------------------------------------------------------------------------------------------------------------------------------------------------------------------------------------------------------------------------------------------------------------------------------------------------------------------------------------------------------------------------------------------------------------------------------------------------------------------------------------------------------------------------------|---------------------------------------------------------------------------------------------------------------------------------------------------------------------------------------------------------------------------------------------------------------------------------------------------------------------------------------------------------------------------------------------------------|
|                                                          | <ul style="list-style-type: none"> <li>- Intravenous glucose tolerance test in a subsample (<math>n=94</math>) [67]</li> </ul> <p><b>Wave IIc (hospital visit)</b></p> <ul style="list-style-type: none"> <li>- Synacthen test in a subsample (<math>n=98</math>) [68]</li> </ul>                                                                                                                                                                                                                                                              |                                                                                                                                                                                                                                                                                                                                                                                                         |
| <p><b>Wave III</b><br/>(Age 63)<br/><br/>2008 - 2009</p> | <ul style="list-style-type: none"> <li>- Questionnaires (General information, medical information, lifestyle factors, physical activity, weight history reproductive history, transgenerational effects, self-perceived health and medication use) [69-71]</li> <li>- Transgenerational effects based on F2 questionnaire (General information, birth characteristics, self-perceived health, exercise, medical information, lifestyle factors) [72]</li> <li>- F0-F1-F2 (grandmother-parent-child) buccal swab for DNA methylation</li> </ul> | <p>601 (44%) of 1372 eligible candidates agreed to participate. 483 F2s (grandchildren) were willing to participate, of which 360 (74.5%) completed the questionnaire. Birthweight or gestational age did not differ between F1 participants and F1 non-participants.</p>                                                                                                                               |
| <p><b>Wave IV</b><br/>(age 68)<br/><br/>2012-2013</p>    | <ul style="list-style-type: none"> <li>- Questionnaires (General information, medical information, lifestyle factors, physical activity, weight history reproductive history, transgenerational effects, self-perceived health and medication use)</li> <li>- Anthropometrics</li> <li>- Blood pressure</li> <li>- Glucose concentration (non-fasting)</li> <li>- Lipid profile (non-fasting)</li> <li>- Cognitive function</li> </ul>                                                                                                         | <p>Equal samples were drawn randomly from each of the groups (1307 eligible candidates in total) until the number of 50 people per exposure group (born before famine, exposed in early gestation, conceived after famine) agreeing to participate was reached. A total number of 151 participants of an eligible group of 268 cohort members (56%) were visited at home. There was a difference in</p> |

1  
2  
3  
4  
5  
6  
7  
8  
9  
10  
11  
12  
13  
14  
15  
16  
17  
18  
19  
20  
21  
22  
23  
24  
25  
26  
27  
28  
29  
30  
31  
32  
33  
34  
35  
36  
37  
38  
39  
40  
41  
42  
43  
44  
45  
46

|                                                   |                                                                                                                                                                                                                                                                                                                                                                                                                                                                                                                                                                                             |                                                                                                                                                                                    |
|---------------------------------------------------|---------------------------------------------------------------------------------------------------------------------------------------------------------------------------------------------------------------------------------------------------------------------------------------------------------------------------------------------------------------------------------------------------------------------------------------------------------------------------------------------------------------------------------------------------------------------------------------------|------------------------------------------------------------------------------------------------------------------------------------------------------------------------------------|
|                                                   | <ul style="list-style-type: none"> <li>- Brain Imaging (MRI) (white matter hyper intensities, cerebral micro bleeds, total cortical, hippocampal and lacunar volume, brain perfusion, resting brain state conditions, BrainAge, brain perfusion) [73-75]</li> <li>- Ageing parameters (Stroke incidence, fractures and osteoporosis, physical performance, visual acuity, cataract, hearing) [76]</li> <li>- Cellular aging (telomere length) [77]</li> </ul>                                                                                                                               | birth weight between the participants ( $n=150$ ) and the nonparticipants ( $n=1,157$ ) of the eligible group ( $n=1,307$ ), 3,438 vs 3,346g; $p = .03$ .                          |
| <b>Wave V</b><br><br>(age 73)<br><br>2018 - 2019  | <ul style="list-style-type: none"> <li>- Questionnaires (including self-perceived health, daily life functioning, pain complaints, mood, memory, attention, and cognition, diseases, tasks and activities in daily life, social activities, quality of life, medical care consumption, stressful events, health problems resulting from stressful events, and childhood experiences)</li> </ul>                                                                                                                                                                                             | 595 (49%) of 1207 eligible candidates agreed to participate. Data analyses are currently ongoing.                                                                                  |
| <b>Wave VI</b><br><br>(age 74)<br><br>2019 - 2020 | <ul style="list-style-type: none"> <li>- Questionnaires (General information, medical information, lifestyle factors, physical activity, weight history reproductive history, transgenerational effects, self-perceived health and medication use)</li> <li>- Anthropometrics</li> <li>- Glucose (non-fasting)</li> <li>- Lipid profile (non-fasting)</li> <li>- Blood pressure</li> <li>- Cognitive function</li> <li>- Brain Imaging (MRI) (white matter hyper intensities, cerebral micro bleeds, structural total and area brain volumes, brain perfusion, BrainAge, resting</li> </ul> | Cohort members who underwent MRI scanning in Wave IV were re-invited for this study. A total of 92 participants were seen in this study. Data analyses are currently being set up. |

1  
2  
3  
4  
5  
6  
7  
8  
9  
10  
11  
12  
13  
14  
15  
16  
17  
18  
19  
20  
21  
22  
23  
24  
25  
26  
27  
28  
29  
30  
31  
32  
33  
34  
35  
36  
37  
38  
39  
40  
41  
42  
43  
44  
45  
46

|  |                                                                                               |  |
|--|-----------------------------------------------------------------------------------------------|--|
|  | brain state conditions, active brain state conditions during Stroop selective attention task) |  |
|--|-----------------------------------------------------------------------------------------------|--|

For peer review only

## Findings to date

Prenatal exposure to undernutrition appears to have (1) permanent effects on human health. The effects of undernutrition (2) depend on its timing during gestation and the organs and systems developing during that critical time window. The effects on later health were most pronounced among those exposed to famine in early gestation. This may not be surprising considering the fact that all organs are formed in early gestation and insufficient food supply during the formation of the organs interferes most with future physiological functions. The effects of famine were independent of size at birth (3) as there were effects of prenatal famine exposure in the absence of effects on body size at birth. This implies that adaptations that enable the foetus to grow can nevertheless have adverse long-term consequences.

Below, we describe the findings according to the 3 main conclusions.

### **1. Prenatal famine exposure has lasting effects on health**

Table 3 gives an overview of findings in the Dutch famine birth cohort study. Exposure to famine was associated with a three-fold higher risk for [39] and earlier onset of coronary heart disease (CHD), [54] a more atherogenic lipid profile, [42] glucose intolerance, [31,52] a disturbed blood coagulation, [43] microalbuminuria and a decrease in creatinine clearance, [41] as well as more respiratory complaints and obstructive airways disease in adulthood. [40] Also, those exposed to famine during gestation were more likely to consume a high-fat diet, [45] and more often perceived their own health as 'poor'. [34] Although there was no indication that prenatal undernutrition increased resting blood pressure, [37] those exposed to undernutrition *in utero* had a higher increase in systolic blood pressure in response to a stressful assignment compared to unexposed individuals. [59] Moreover, they performed worse on a selective attention task, a cognitive ability that usually declines with increasing age. [55] Women prenatally exposed to famine were more centrally obese, [36] had a five times increased risk for developing breast cancer, [49] and an overall higher

1  
2  
3 mortality rate, as well as a higher cardiovascular mortality, cancer mortality, and breast cancer  
4 mortality.[78] In men, exposure to famine during gestation was associated with smaller intracranial  
5 volume.[73] Moreover, their brain appeared older, as assessed by a machine-learning pattern  
6 recognition method that is able to estimate individual brain ages based on T1-weighted MR images,  
7 and overall perfusion of the brain was worse compared to controls.[74,75] Also, prenatal exposure to  
8 famine was associated with increased symptoms of depression and anxiety,[46] and a lower physical  
9 performance score in men.[76] In terms of transgenerational effects, babies born to women exposed  
10 to famine prenatally were more adipose as neonates, and parents that had been exposed to famine  
11 in utero themselves more often reported their child to have a poorer health.[51] Offspring of men  
12 exposed to famine in utero had an increased weight and a higher BMI at age 37 years.[72]

23  
24  
25  
26  
27 **2. The effects were dependent of its timing during gestation (and the organs and tissues**  
28 **growing at that time)**

29  
30  
31  
32 Our findings suggest that famine exposure during periods of rapid organ growth permanently affects  
33 organ structure. The majority of adverse effects of prenatal famine on several (precursors of) chronic  
34 diseases were observed specifically in those exposed during **early**  
35 gestation.[34,36,39,42,43,45,46,49,54,55,59,73-76,78] Since organogenesis takes place in early  
36 gestation it is not surprising that exposure to undernutrition during this critical period of  
37 development has the most detrimental effects on later life physical and mental health. The effects on  
38 renal function and respiratory complaints were observed only in those who had experienced famine  
39 in utero during *mid* gestation.[40,41] This fits with the stage of rapid expansion of nephron number  
40 and of rapid bronchial tree branching in mid-pregnancy in fetuses.[79,80] Finally, across all  
41 trimesters, but particularly in *mid and late* gestation, famine was associated with offspring glucose  
42 intolerance in later life.[31,52] During mid and late gestation, the endocrine pancreas undergoes  
43 rapid proliferation.[81] Altogether, our findings are highly suggestive of specific windows of  
44  
45  
46  
47  
48  
49  
50  
51  
52  
53  
54  
55  
56  
57  
58  
59  
60

1  
2  
3 increased sensitivity for negative effects of famine on various organ systems, depending on the  
4 gestational period in which cell division is at its peak.  
5  
6

### 7 8 9 **3. The effects were independent of size at birth**

10  
11  
12 One of the findings of the Dutch famine birth cohort study is that babies born after exposure to the  
13 famine in **mid** (difference = -165 gr, 95%CI -220 to -109) or **late** (difference = -257 gr, 95%CI = -312 to  
14 -202) gestation had lower birth weights, whereas babies born after exposure to the famine in **early**  
15 (difference = 79 gr, 95%CI = 16 to 143) gestation had higher birth weight compared to controls (Table  
16 1).[33] This is tremendously striking, since the long-term programming effects of prenatal maternal  
17 undernutrition on adult health have traditionally been assumed to be mediated by poor fetal growth  
18 and hence marked by a low birth weight. However, we found that the majority of the effects of  
19 prenatal famine exposure on adverse health outcomes in adults were observed in those exposed to  
20 famine in **early** gestation, and thus, in those with normal birth weight. Moreover, additional  
21 adjustment for birthweight showed that the effect of prenatal exposure to famine on the adult  
22 physical and mental health outcomes were independent of birthweight. In other words, prenatal  
23 famine had a major negative affect on adult health, without affecting birth weight. Our findings thus  
24 suggest that adverse effects of maternal famine exposure on fetal organ development and function  
25 are independent of size at birth.  
26  
27  
28  
29  
30  
31  
32  
33  
34  
35  
36  
37  
38  
39  
40  
41  
42  
43

44 Further information, including a list of publications can be found on the cohort's web-page  
45 [[www.hongerwinter.nl](http://www.hongerwinter.nl)].  
46  
47  
48  
49  
50  
51  
52  
53  
54  
55  
56  
57  
58  
59  
60

**Table 3.** Adult characteristics of the Dutch famine birth cohort study from the age of 50 years, divided in columns based upon the gestational period of prenatal famine exposure.

| Age | Ref  | Adult characteristics                   | Born before | Late gestation | Mid gestation | Early gestation | Conceived after | Mean (sd)    | n   |
|-----|------|-----------------------------------------|-------------|----------------|---------------|-----------------|-----------------|--------------|-----|
| 50  | [39] | Coronary Heart Disease (%)              | 3.8         | 2.5            | 0.9           | <b>8.8*</b>     | 2.6             | 3.3          | 736 |
|     | [42] | LDL:HDL cholesterol <sup>1</sup>        | 2.91        | 2.82           | 2.69          | 3.26            | 2.94            | 2.90 (1.53)  | 704 |
|     | [31] | 120 min. Glucose <sup>1</sup> (mmol/L)  | 5.7         | <b>6.3*</b>    | <b>6.1*</b>   | <b>6.1*</b>     | 5.9             | 6.0 (1.4)    | 702 |
|     |      | 120 min. insulin <sup>1</sup> (mmol/L)  | 160         | <b>200*</b>    | <b>190*</b>   | <b>207*</b>     | 181             | 181 (2.4)    | 694 |
|     | [43] | Fibrinogen (g/l)                        | 3.02        | 3.05           | 3.05          | 3.21            | 3.10            | 3.07 (0.6)   | 725 |
|     |      | Factor VII <sup>1</sup> (% of standard) | 127.7       | 130.7          | 132.7         | <b>116.9*</b>   | 132.6           | 129.4 (1.4)  | 725 |
|     | [37] | SBP (mmHg)                              | 126.0       | 127.4          | 124.8         | 123.4           | 125.1           | 125.5 (15.5) | 739 |
|     |      | DBP (mmHg)                              | 86.2        | 86.4           | 84.4          | 84.8            | 85.2            | 85.6 (9.9)   | 739 |
|     | [36] | BMI <sup>1</sup> (kg/m <sup>2</sup> )   | 26.7        | 26.7           | 26.6          | <b>28.1*♀</b>   | 27.2            | 27.0 (1.2)   | 741 |
|     |      | Waist circumference (cm)                | 91.8        | 92.4           | 91.0          | <b>95.6*♀</b>   | 92.5            | 92.3 (13)    | 741 |



|            |            |                                        |                    |                       |                      |                        |                        |                  |          |
|------------|------------|----------------------------------------|--------------------|-----------------------|----------------------|------------------------|------------------------|------------------|----------|
|            | [34]       | Perceived health poor (%)              | 4.5                | 6.4                   | 3.7                  | <b>10.3*</b>           | 5.3                    | 5.5              | 912      |
|            | [41]       | Microalbuminuria (ACR $\geq$ 2.5) (%)  | 8                  | 7                     | <b>12*</b>           | 9                      | 4                      | 7                | 724      |
|            | [40]       | FEV1/FVC (x100)                        | 0.72               | 0.72                  | 0.72                 | 0.72                   | 0.74                   | 0.72 (0.1)       | 726      |
|            |            | Obstructive airways disease (%)        | 15.5               | 15.0                  | <b>24.8*</b>         | 23.0                   | 17.3                   | 18.1             | 726      |
|            |            | Total IgE <sup>1</sup> (IU/ml)         | 31.0               | 27.2                  | 28.9                 | 27.9                   | 33.1                   | 30.4 (4.6)       | 726      |
|            | [82]       | Mortality 18–50 years (%)              | 5.3                | 3.9                   | 2.8                  | 5.0                    | 3.6                    | -                | 2254     |
| <b>Age</b> | <b>Ref</b> | <b>Adult characteristics</b>           | <b>Born before</b> | <b>Late gestation</b> | <b>Mid gestation</b> | <b>Early gestation</b> | <b>Conceived after</b> | <b>Mean (sd)</b> | <b>n</b> |
| <b>58</b>  | [59]       | $\Delta$ SBP (mmHg)                    | 19                 | 20                    | 19                   | <b>23*</b>             | 19                     | 20 (16)          | 721      |
|            |            | Stroop Response                        |                    |                       |                      |                        |                        |                  |          |
|            | [52]       | 120 min. Glucose <sup>1</sup> (mmol/L) | 5.8                | <b>6.2*</b>           | <b>6.2*</b>          | <b>6.2*</b>            | 5.9                    | 6.0              | 678      |
|            |            | 120 min. insulin <sup>1</sup> (pmol/L) | 242                | <b>263*</b>           | <b>254*</b>          | <b>269*</b>            | 240                    | 249 (2.1)        | 672      |
|            | [45]       | >39% of energy from                    | 25.9               | 28.7                  | 20.2                 | <b>40.7*</b>           | 24.9                   | -                | 730      |

|            |            |                                            |                    |                       |                      |                        |                        |                  |          |
|------------|------------|--------------------------------------------|--------------------|-----------------------|----------------------|------------------------|------------------------|------------------|----------|
|            |            | fat (%)                                    |                    |                       |                      |                        |                        |                  |          |
|            | [55]       | Stroop Task Score <sup>2</sup> (% correct) | 42.3               | 36.5                  | 40.0                 | <b>27.5*</b>           | 43.9                   | 38.5 (55.7)      | 714      |
|            |            | AH4 test Score <sup>2</sup> (% correct)    | 70.9               | 72.4                  | 71.8                 | 76.0                   | 73.3                   | 72.4 (19.0)      | 727      |
|            |            | Memory task Retrieval (%)                  | 81.8               | 78.5                  | 83.2                 | 79.7                   | 79.6                   | 80.7(19.9)       | 583      |
|            |            | Mirror Task Errors per round <sup>2</sup>  | 13                 | 12                    | 10                   | 14                     | 10                     | 12 (30)          | 643      |
|            | [49]       | Breast Cancer (%)                          | 2.8                | 3.7                   | 3.9                  | <b>8.7*</b>            | 0.8                    | 3.2              | 475      |
|            | [83]       | Mortality 18-57 years (%)                  | 9.1                | 4.4                   | 6.0                  | 6.5                    | 5.9                    | -                | 2245     |
|            | [46]       | HADS-A score                               | 4.5                | 4.7                   | 5.1                  | 5.8                    | 5.1                    | 4.9 (3.1)        | 639      |
|            |            | HADS-A ≥ 8 points (OR)                     | 1.0 (ref)          | 0.7                   | 1.1                  | <b>2.7*♂</b>           | 1.0                    | -                | 369      |
|            |            | HADS-D                                     | 3.1                | 3.0                   | 3.1                  | <b>4.9*♂</b>           | 3.6                    | 3.2 (3.1)        | 369      |
|            |            | HADS-D ≥ 8 points (OR)                     | 1.0 (ref)          | 0.9                   | 0.6                  | 1.7                    | 1.0                    | -                | 369      |
| <b>Age</b> | <b>Ref</b> | <b>Adult characteristics</b>               | <b>Born before</b> | <b>Late gestation</b> | <b>Mid gestation</b> | <b>Early gestation</b> | <b>Conceived after</b> | <b>Mean (sd)</b> | <b>n</b> |
| <b>63</b>  | [78]       | Overall adult mortality (HR)               | 1.0 (ref)          | 0.8                   | 0.5                  | <b>1.9*♀</b>           | 1.0 (ref)              | -                | 1125     |

|                                                |            |                                                |                    |                           |                      |                        |                        |                  |          |
|------------------------------------------------|------------|------------------------------------------------|--------------------|---------------------------|----------------------|------------------------|------------------------|------------------|----------|
|                                                |            | Cardiovascular mortality (HR)                  | 1.0 (ref)          | - (zero deaths)           | 0.6                  | <b>4.6*♀</b>           | 1.0 (ref)              | -                | 1125     |
|                                                |            | Cancer mortality (HR)                          | 1.0 (ref)          | 1.0                       | 0.5                  | <b>2.3*♀</b>           | 1.0 (ref)              | -                | 1125     |
|                                                |            | Breast cancer mortality (HR)                   | 1.0 (ref)          | 2.1                       | 1.5                  | <b>8.3*♀</b>           | 1.0 (ref)              | -                | 1125     |
| <b>Age</b>                                     | <b>Ref</b> | <b>Adult characteristics</b>                   | <b>Born before</b> | <b>Late gestation</b>     | <b>Mid gestation</b> | <b>Early gestation</b> | <b>Conceived after</b> | <b>Mean (sd)</b> | <b>n</b> |
| <b>68</b>                                      | [73-75]    | ICV (ml)                                       | 1138               | -                         | -                    | <b>1101*</b><br>♂      | 1176                   | 1138 (85)        | 52       |
|                                                |            | BrainAGE score (years)                         | -1.81              | -                         | -                    | <b>2.53*</b><br>♂      | 0.53                   | -                | 52       |
|                                                |            | Spatial Coefficient of Variance of a CBF image | 0.60               | -                         | -                    | <b>0.64*</b><br>♂      | 0.59                   | 0.61 (0.08)      | 50       |
|                                                | [76]       | Grip strength (kg)                             | 46.3 <sup>3</sup>  | -                         | -                    | <b>42.1*</b>           | 46.3 <sup>3</sup>      | -                | 67       |
|                                                |            | Physical performance score (points)            | 9.7 <sup>3</sup>   | -                         | -                    | <b>8.9*</b>            | 9.7 <sup>3</sup>       | -                | 67       |
| <b>Transgenerational - F2 offspring of F1♀</b> |            |                                                |                    |                           |                      |                        |                        |                  |          |
| <b>Age</b>                                     | <b>Ref</b> | <b>Adult characteristics</b>                   | <b>Born before</b> | <b>Exposure to famine</b> |                      |                        | <b>Conceived after</b> | <b>Mean (sd)</b> | <b>n</b> |
|                                                | [51]       | Birth weight (grams)                           | 3476               | 3484                      |                      |                        | 3468                   | -                | 856      |

|                                                                  |            |                                             |                            |                           |                          |                  |          |
|------------------------------------------------------------------|------------|---------------------------------------------|----------------------------|---------------------------|--------------------------|------------------|----------|
| 33                                                               |            | Ponderal index (kg/m <sup>3</sup> )         | 26.6                       | <b>27.8*</b>              | 26.5                     | -                | 856      |
|                                                                  |            | F2 poor health <sup>a</sup> (%)             | 16                         | 18                        | 14                       | -                | 856      |
| <b>Age</b>                                                       | <b>Ref</b> | <b>Adult characteristics</b>                | <b>Unexposed to famine</b> |                           | <b>Exposed to famine</b> | <b>Mean (sd)</b> | <b>n</b> |
| 35                                                               | [72]       | Adult weight (kg)                           | 78.9                       | 79.1                      |                          | 79.0             | 209      |
|                                                                  |            | Adult BMI <sup>1</sup> (kg/m <sup>2</sup> ) | 25.7                       | 25.0                      |                          | 25.3             | 209      |
| <b>Transgenerational - F2 offspring of F1<math>\sigma</math></b> |            |                                             |                            |                           |                          |                  |          |
| <b>Age</b>                                                       | <b>Ref</b> | <b>Adult characteristics</b>                | <b>Born before</b>         | <b>Exposure to famine</b> | <b>Conceived after</b>   | <b>Mean (sd)</b> | <b>n</b> |
| 30                                                               | [51]       | Birth weight (grams)                        | 3304                       | 3298                      | 856                      | -                | 640      |
|                                                                  |            | Ponderal index (kg/m <sup>3</sup> )         | 25.9                       | 25.9                      | 26.3                     | -                | 640      |
|                                                                  |            | F2 poor health <sup>a</sup> (%)             | 12                         | 12                        | 8                        | -                | 640      |
| <b>Age</b>                                                       | <b>Ref</b> | <b>Adult characteristics</b>                | <b>Unexposed to famine</b> |                           | <b>Exposed to famine</b> | <b>Mean (sd)</b> | <b>n</b> |
| 35                                                               | [72]       | Adult weight (kg)                           | 73.5                       | <b>78.8*</b>              |                          | 75.3             | 151      |
|                                                                  |            | Adult BMI <sup>1</sup> (kg/m <sup>2</sup> ) | 23.8                       | <b>25.2*</b>              |                          | 24.3             | 151      |

LDL:HDL = Low Density Lipoprotein : High Density Lipoprotein, SBP = Systolic Blood Pressure, DBP = Diastolic Blood Pressure, BMI = Body Mass Index, FEV1/FVC = Forced Expiratory Volume / Forced

1  
2  
3 Vital Capacity, HADS-A = Hospital Anxiety and Depression Scale - Anxiety subscale, HADS-D = Hospital  
4 Anxiety and Depression Scale - Depression subscale, ICV = Intracranial Volume, TBV = Total Brain  
5 Volume, CBF = Cerebral Blood Flow  
6

7  
8 <sup>1</sup>: Geometric means (SD)  
9

10 <sup>2</sup>: Medians (IQR)  
11

12 <sup>3</sup>: Congenital: asphyxia, developmental delay, Down syndrome, congenital heart disorders;  
13 cardiovascular and metabolic: diabetes, acquired cardiovascular conditions, obesity; psychiatric:  
14 schizophrenia, depression, suicide (attempt), drug/alcohol dependency; other: accidental, acquired  
15 neurological, autoimmune, respiratory, infectious, neoplastic, dermatological conditions.  
16

17  
18 \*:  $p \leq 0.05$  compared to unexposed (born before and conceived after the famine)  
19

20 ♀ Measured both in men and women, results shown here only include sex-specific significant  
21 associations (women)  
22

23 ♂ Measured both in men and women, results shown here only include sex-specific significant  
24 associations (men)  
25  
26  
27  
28  
29  
30  
31  
32  
33  
34  
35  
36  
37  
38  
39  
40  
41  
42  
43  
44  
45  
46  
47  
48  
49  
50  
51  
52  
53  
54  
55  
56  
57  
58  
59  
60

### Strengths and limitations

A strength of the Dutch famine birth cohort study is its quasi-experimental design. This design reduces the chance that associations between prenatal famine exposure and adult health outcomes are due to genetic inheritance of mother and child or socio-economic status, since exposure to famine was completely independent of maternal characteristics such as age or parity, socio-economic status and other environmental circumstances that may affect long-term health of their children. Nevertheless, exposed and unexposed individuals may have differed on other genetically inherited characteristics which we did not measure. The Dutch hunger winter families study is a different cohort study that used an approach with subtle differences to that of the Dutch famine birth cohort.[84] This cohort was set up in 2003 to study adult health in individuals born in one of three institutions in famine-exposed cities (Amsterdam, Rotterdam, Leiden) to women who had been exposed to famine during or immediately preceding pregnancy. The Dutch hunger winter families study differed from the Dutch famine birth cohort study in one essential aspect: Controls were unexposed same-sex siblings and not unrelated time controls born before or conceived after the famine, to account for any potential genetic influences on later life health outcomes.[84] Interestingly, the findings between the two cohorts are strikingly similar, and suggest that the consequences that both studies find of prenatal famine exposure are due to a causal effect of famine exposure rather than due to confounding.

Another strength of our study design was that, due to the relatively short period of the famine, the exposed individuals are unlikely to substantially differ from unexposed individuals in terms of general socio-environmental conditions, indicating that famine exposure is one of the single remaining factors that can explain differences between both groups. Factors which we cannot control for are, firstly, the possible heightened levels of psychological and/or physical stress in women experiencing famine, which may have affected fetal development also, or, secondly, specific dietary changes that co-occurred at the time of the famine which may have impacted fetal development. Examples of the

1  
2  
3 latter could include tulip bulb consumption. Our analyses do not allow us to dissect effects of lack of  
4  
5 food from stress or increased rates of infection due to famine exposure. Interestingly, the effects of  
6  
7 postnatal famine exposure which has occurred among those born before the famine seem to be  
8  
9 limited as the adult health outcomes of those born before the famine and those conceived after it  
10  
11 are strikingly similar.  
12  
13

14  
15 A relative weakness of the cohort is possible selective conception and survival. During the famine,  
16  
17 fertility rates decreased by approximately 50%, due to increased amenorrhea among women.[16,17]  
18  
19 Also, perinatal mortality was higher during the famine.[17,85] Both the decreased conception rates  
20  
21 and increase in perinatal mortality during the famine may have led to selective births of 'stronger'  
22  
23 individuals. However, when we compared maternal characteristics such as socio-economic status,  
24  
25 age and parity between those who conceived during the famine and those who gave birth before or  
26  
27 conceived after the famine, we found no major differences except that early exposed women were  
28  
29 more frequently unmarried. An increase in infant mortality of those with poorer health during the  
30  
31 famine is also not likely to explain our findings, as the majority of the associations between prenatal  
32  
33 famine and adverse health outcomes was observed in those conceived during the famine.  
34  
35  
36  
37

38  
39 Another weakness of the study especially as the cohort grows older, is that more resilient individuals  
40  
41 may remain alive and in good health, in particular those who are motivated to participate in the  
42  
43 study. Selective attrition may have particularly affected the group of exposed individuals, as we have  
44  
45 shown that this group was particularly affected by famine exposure in utero, reflected by more  
46  
47 deaths (in women) and poorer health outcomes. This asymmetric loss of adults with poorer health  
48  
49 may have led to an under estimation of the true effects of prenatal famine on adult health outcomes.  
50  
51  
52

53  
54 A final limitation to the study is that we have no information on the time period between discharge  
55  
56 from the hospital after birth and age 50 when the cohort was first traced, making it impossible to  
57  
58 adjust for potential confounders that may have had an influence during this period.  
59  
60

### Similar findings in different settings

Studies in other settings, of famines with different durations and severity support these findings and suggest that the results of studies on the Dutch famine are not uniquely linked to the Dutch famine situation, but rather reflect biologically fundamental processes of human plasticity.[86] A study in Nigeria showed that people who had been exposed to the Biafran famine (1967–1970) prenatally had increased rates of hypertension and type 2 diabetes.[87] Similarly, studies of the Great Leap Forward famine in China have shown similar effects of prenatal famine exposure on later risks of diabetes, hypertension and schizophrenia.[88-90] And similarly studies of Austrian [91] and Ukrainian [92] showed increased risks of diabetes among those who had been exposed to famine prenatally.

### Implications

Studies of the Dutch and other famines show that those faced with undernutrition during the critical earliest stages of development have increased rates of chronic generative disease in adult life. These findings teach us the fundamental importance of a good start in life. Adequately feeding women before and during pregnancy will allow future generations to reach their full potential and lead healthier and more productive lives, ultimately leading to healthier and more equal future.

### Collaboration

The Dutch famine birth cohort study welcomes opportunities for collaboration; Enquiries should be directed to the Principal Investigator [t.j.roseboom@amsterdamumc.nl].



## Acknowledgements

We would like to thank the members of the Dutch famine birth cohort for their participation in our studies. We would also like to thank all researchers and other staff who have worked with us on study design, data collection, assessments, analyses and drafting of manuscript.

## Funding and competing interests

The Dutch famine birth cohort study has been funded by the Diabetes Fonds (The Netherlands, Grant Number NA), the Netherlands Heart Foundation (NHS2001B087, NHS2007B083), The European Science Foundation (EUROSTRESS-DOME project), the European Commission (Brainage (Seventh Framework Program Project 279281), Dynahealth (Horizon 2020 Project 633595), Longitools (Horizon 2020 Project 874739), Wellbeing (UK, Grant Number NA), the Medical Research Council (UK, Grant Number NA), the Dutch Research Council (NWO Aspasia Project 015014039) and the Academic Medical Centre (Amsterdam, The Netherlands, Grant number NA). We declare no conflict of interest.

## Data sharing statement

Data are available upon reasonable request. Please contact the Principal Investigator [t.j.roseboom@amsterdaumumc.nl] if you are interested in collaboration.

## Author Contributions

ACJR, RCP, SRdR and TJR contributed to parts of the development of methods and parts of the data collection. All authors were involved in data analysis and interpretation. LSB, SRdR and TJR drafted the work. All authors have critically revised this article and approved the final version to be published.

**Figure 1.** Dutch famine birth cohort schematic presentation of gestational famine exposure.

1  
2  
3 **Figure 2.** Dutch famine birth cohort schematic presentation of study waves.  
4  
5  
6  
7  
8  
9  
10  
11  
12  
13  
14  
15  
16  
17  
18  
19  
20  
21  
22  
23  
24  
25  
26  
27  
28  
29  
30  
31  
32  
33  
34  
35  
36  
37  
38  
39  
40  
41  
42  
43  
44  
45  
46  
47  
48  
49  
50  
51  
52  
53  
54  
55  
56  
57  
58  
59  
60

For peer review only

## References

1. Mu M, Wang SF, Sheng J, Zhao Y, Li HZ, Hu CL, et al. Birth weight and subsequent blood pressure: a meta-analysis. *Arch Cardiovasc Dis*. 2012;105(2):99-113.
2. Davies AA, Smith GD, Ben-Shlomo Y, Litchfield P. Low birth weight is associated with higher adult total cholesterol concentration in men: findings from an occupational cohort of 25,843 employees. *Circulation*. 2004;110(10):1258-62.
3. Whincup PH, Kaye SJ, Owen CG, Huxley R, Cook DG, Anazawa S, et al. Birth weight and risk of type 2 diabetes: a systematic review. *JAMA*. 2008;300(24):2886-97.
4. Knop MR, Geng TT, Gorny AW, Ding R, Li C, Ley SH, et al. Birth Weight and Risk of Type 2 Diabetes Mellitus, Cardiovascular Disease, and Hypertension in Adults: A Meta-Analysis of 7 646 267 Participants From 135 Studies. *Journal of the American Heart Association*. 2018;7(23):e008870.
5. Mohseni R, Mohammed SH, Safabakhsh M, Mohseni F, Monfared ZS, Seyyedi J, et al. Birth Weight and Risk of Cardiovascular Disease Incidence in Adulthood: a Dose-Response Meta-analysis. *Curr Atheroscler Rep*. 2020;22(3):12.
6. Risnes KR, Vatten LJ, Baker JL, Jameson K, Sovio U, Kajantie E, et al. Birthweight and mortality in adulthood: a systematic review and meta-analysis. *Int J Epidemiol*. 2011;40(3):647-61.
7. Barker DJP, Osmond C. Infant mortality, childhood nutrition and ischaemic heart disease in England and Wales. *Lancet*. 1986;10 May:1077-81.
8. Hoffman DJ, Reynolds RM, Hardy DB. Developmental origins of health and disease: current knowledge and potential mechanisms. *Nutr Rev*. 2017;75(12):951-70.
9. Van Abeelen AF, Veenendaal MV, Painter RC, De Rooij SR, Thangaratinam S, Van Der Post JA, et al. The fetal origins of hypertension: a systematic review and meta-analysis of the evidence from animal experiments of maternal undernutrition. *J Hypertens*. 2012;30(12):2255-67.
10. Veenendaal MV, Thangaratinam S, Yates D, Painter R, Rooij D, Jam vdP, et al. Is the Fetal Origins Hypothesis of Diabetes Supported by Animal Research? A Systematic Review and Meta-Analysis of the Evidence. *Journal of diabetes & metabolism*. 2013;2013:1-8.
11. Chavatte-Palmer P, Tarrade A, Rousseau-Ralliard D. Diet before and during Pregnancy and Offspring Health: The Importance of Animal Models and What Can Be Learned from Them. *Int J Environ Res Public Health*. 2016;13(6).
12. Dols MJL, Arcken DJAM. Food supply and nutrition in the Netherlands during and immediately after world war II. 1st ed. New York: Milbank Memorial Fund; 1946 1946.
13. Oorlogstijd RvdVi. Verloop der rantsoenering van de gedistribueerde levensmiddelen voor verschillende leeftijdsgroepen periode 27 April 1941 - 1 October 1944. 1944.
14. Oorlogstijd RvdVi. Overzichten per dag periode 1 Oct 1944 - 22 juli 1945 voor West-Nederland. 1945.
15. Stare FJ. Nutritional conditions in Holland. *Nutrition Reviews*. 1945;3:225-7.
16. Burger GCE, Sandstead HR, Drummond JC. Malnutrition and Starvation in Western Netherlands, September 1944 to July 1945. Part I and II. The Hague: General State Printing Office; 1948 1948.
17. Stein Z, Susser M, Saenger G, Morolla F. Famine and Human Development. The Dutch Hunger Winter of 1944-45. New York: Oxford University Press; 1975 1975.
18. Smith CA. Effects of maternal undernutrition upon the newborn infant in Holland (1944-1945). *Journal of Paediatrics*. 1947;30:229-43.
19. Sindram IS. De invloed van ondervoeding op de groei van de vrucht. *Nederlands Tijdschrift voor Verloskunde en Gynaecologie*. 1953;53:30-48.
20. Stein Z, Susser M, Saenger G, Marolla F. Nutrition and mental performance. *Science*. 1972;178:708-13.
21. Ravelli GP, Stein ZA, Susser MW. Obesity in young men after famine exposure in utero and early infancy. *New England Journal of Medicine*. 1976;7:349-54.

22. Susser ES, Lin SP. Schizophrenia after prenatal exposure to the Dutch Hunger Winter of 1944-1945. *Arch Gen Psychiatry*. 1992;49:983-8.
23. Susser E, Neugebauer R, Hoek HW, Brown AS, Lin S, Labovitz D, et al. Schizophrenia after prenatal famine. *Arch Gen Psychiatry*. 1996;53:25-31.
24. Brown A, Van Os J, Driessens C, Hoek H, Susser E. Further evidence of relation between prenatal famine and major affective disorder. *American Journal of Psychiatry*. 2000;157(2):190-5.
25. Brown AS, Susser ES, Lin SP, Neugebauer R, Gorman JM. Increased risk of affective disorders in males after second trimester prenatal exposure to the Dutch Hunger Winter of 1944-45. *British Journal of Psychiatry*. 1995;166:601-6.
26. Hoek HW, Brown AS, Susser E. The Dutch Famine and schizophrenia spectrum disorders. *Social Psychiatry and Psychiatric Epidemiology*. 1998;33:373-9.
27. Hoek HW, Susser EZ, Buck K, Lumey LH, Lin SP, Gorman JM. Schizoid personality disorder after prenatal exposure to famine. *American Journal of Psychiatry*. 1996;153:1637-9.
28. Neugebauer R, Hoek HW, Susser E. Prenatal exposure to Wartime famine and development of antisocial personality disorder in early adulthood. *JAMA*. 1999;282:455-62.
29. Barker DJP. The fetal origins of diseases of old age. *European Journal of Clinical Nutrition*. 1992;46 suppl 3:S3-S9.
30. Lumey LH, Ravelli ACJ, Wiessing LG, Koppe JG, Treffers PE, Stein ZA. The Dutch famine birth cohort study: design, validation of exposure, and selected characteristics of subjects after 43 years follow-up. *Paediatric and Perinatal Epidemiology*. 1993;7(4):354-67.
31. Ravelli ACJ, van der Meulen JHP, Michels RPJ, Osmond C, Barker DJP, Hales CN, et al. Glucose tolerance in adults after prenatal exposure to famine. *Lancet*. 1998;351:173-7.
32. Barker DJP. Fetal nutrition and cardiovascular disease in later life. *British Medical Bulletin*. 1997;53:96-108.
33. Ravelli AC. Prenatal exposure to the Dutch famine and glucose tolerance and obesity at age 50. Amsterdam: AMC-University of Amsterdam; 1999.
34. Roseboom TJ, Van Der Meulen JH, Ravelli AC, Osmond C, Barker DJ, Bleker OP. Perceived health of adults after prenatal exposure to the Dutch famine. *PaediatrPerinatEpidemiol*. 2003;17(4):391-7.
35. Painter RC, Westendorp RG, de Rooij SR, Osmond C, Barker DJ, Roseboom TJ. Increased reproductive success of women after prenatal undernutrition. *HumReprod*. 2008;23(11):2591-5.
36. Ravelli ACJ, van der Meulen JHP, Osmond C, Barker DJP, Bleker OP. Obesity at the age of 50 y in men and women exposed to famine prenatally. *AJCN*. 1999;70:811-6.
37. Roseboom TJ, van der Meulen JHP, Ravelli ACJ, van Montfrans GA, Osmond C, Barker DJP, et al. Blood pressure in adults after prenatal exposure to famine. *J Hypertens*. 1999;17:325-30.
38. Roseboom TJ, van der Meulen JHP, van Montfrans GA, Ravelli ACJ, Osmond C, Barker DJP, et al. Maternal nutrition during gestation and blood pressure in later life. *J Hypertens*. 2001;19:29-34.
39. Roseboom TJ, van der Meulen JHP, Osmond C, Barker DJP, Ravelli ACJ, Tanka JS, et al. Coronary heart disease after prenatal exposure to the Dutch famine, 1944-45. *Heart*. 2000;84:595-8.
40. Lopuhaa C, Roseboom TJ, Osmond C, Barker DJP, Ravelli ACJ, Bleker OP, et al. Atopy, lung function and obstructive airways disease after prenatal exposure to famine. *Thorax*. 2000;55:555-61.
41. Painter RC, Roseboom TJ, van Montfrans GA, Bossuyt PM, Krediet RT, Osmond C, et al. Microalbuminuria in adults after prenatal exposure to the Dutch famine. *JAmSocNephrol*. 2005;16(1):189-94.
42. Roseboom TJ, van der Meulen JHP, Osmond C, Barker DJP, Ravelli ACJ, Bleker OP. Plasma lipid profiles in adults after prenatal exposure to the Dutch famine. *AJCN*. 2000;72:1101-6.
43. Roseboom TJ, van der Meulen JHP, Ravelli ACJ, Osmond C, Barker DJP, Bleker OP. Plasma fibrinogen and factor VII concentrations in adults after prenatal exposure to famine. *Br J Haematol*. 2000;111:112-7.
44. Horenblas J, de Rooij SR, Roseboom TJ. The risk of stroke after prenatal exposure to famine. *J Dev Orig Health Dis*. 2017;8(6):658-64.

- 1
- 2
- 3
- 4 45. Lussana F, Painter RC, Ocke MC, Buller HR, Bossuyt PM, Roseboom TJ. Prenatal exposure to
- 5 the Dutch famine is associated with a preference for fatty foods and a more atherogenic lipid profile.
- 6 *AmJ Clin Nutr.* 2008;88(6):1648-52.
- 7 46. de Rooij SR, Painter RC, Phillips DI, Raikonen K, Schene AH, Roseboom TJ. Self-reported
- 8 depression and anxiety after prenatal famine exposure: mediation by cardio-metabolic pathology? *J*
- 9 *Dev Orig Health Dis.* 2011;2(3):136-43.
- 10 47. de Rooij SR, Painter RC, Swaab DF, Roseboom TJ. Sexual orientation and gender identity after
- 11 prenatal exposure to the Dutch famine. *Arch Sex Behav.* 2009;38(3):411-6.
- 12 48. Klooker TK, Braak B, Painter RC, de Rooij SR, van Elburg RM, van den Wijngaard RM, et al.
- 13 Exposure to severe wartime conditions in early life is associated with an increased risk of irritable
- 14 bowel syndrome: a population-based cohort study. *Am J Gastroenterol.* 2009;104(9):2250-6.
- 15 49. Painter RC, de Rooij SR, Bossuyt PM, Osmond C, Barker DJ, Bleker OP, et al. A possible link
- 16 between prenatal exposure to famine and breast cancer: A preliminary study. *AmJHumBiol.*
- 17 *2006;18(6):853-6.*
- 18 50. van Abeelen AFM, de Rooij SR, Osmond C, Painter RC, Veenendaal MVE, Bossuyt PMM, et al.
- 19 The sex-specific effects of famine on the association between placental size and later hypertension.
- 20 *Placenta.* 2011;32(9):694-8.
- 21 51. Painter RC, Osmond C, Gluckman P, Hanson M, Phillips DI, Roseboom TJ. Transgenerational
- 22 effects of prenatal exposure to the Dutch famine on neonatal adiposity and health in later life. *Bjog.*
- 23 *2008;115(10):1243-9.*
- 24 52. de Rooij SR, Painter RC, Roseboom TJ, Phillips DI, Osmond C, Barker DJ, et al. Glucose
- 25 tolerance at age 58 and the decline of glucose tolerance in comparison with age 50 in people
- 26 prenatally exposed to the Dutch famine. *Diabetologia.* 2006;49:637-43.
- 27 53. de Rooij SR, Painter RC, Holleman F, Bossuyt PM, Roseboom TJ. The metabolic syndrome in
- 28 adults prenatally exposed to the Dutch famine. *AmJ Clin Nutr.* 2007;86(4):1219-24.
- 29 54. Painter RC, de Rooij SR, Roseboom TJ, Bossuyt PMM, Simmers TA, Osmond C, et al. Early
- 30 onset of coronary artery disease after prenatal exposure to the Dutch famine. *AJCN.* 2006;84(2):322-
- 31 7.
- 32 55. de Rooij SR, Wouters H, Yonker JE, Painter RC, Roseboom TJ. Prenatal undernutrition and
- 33 cognitive function in late adulthood. *ProcNatlAcadSciUSA.* 2010;107(39):16881-6.
- 34 56. Painter RC, de Rooij SR, Hutten BA, Bossuyt PM, de GE, Osmond C, et al. Reduced intima
- 35 media thickness in adults after prenatal exposure to the Dutch famine. *Atherosclerosis.*
- 36 *2006;193(2):421-7.*
- 37 57. Painter RC, de Rooij SR, Bossuyt PM, de GE, Stok WJ, Osmond C, et al. Maternal nutrition
- 38 during gestation and carotid arterial compliance in the adult offspring: the Dutch famine birth cohort.
- 39 *JHypertens.* 2007;25(3):533-40.
- 40 58. Veenendaal MVEdR, S.R.; Painter R.C.; Robinson, S.; Osmond, C.; Sayer, A.A.; Roseboom, T.J.
- 41 Grip strength at age 58 after prenatal exposure to the Dutch famine. *J Aging Res Clin Pract.* 2012;1.
- 42 59. Painter RC, de Rooij SR, Bossuyt PM, Phillips DI, Osmond C, Barker DJ, et al. Blood pressure
- 43 response to psychological stressors in adults after prenatal exposure to the Dutch famine. *J*
- 44 *Hypertens.* 2006;24(9):1771-8.
- 45 60. de Rooij SR, R.C. P, Phillips DIW, Osmond C, Tanck MWT, P.M.M. B, et al. Cortisol responses
- 46 to psychological stress in adults after prenatal exposure to the Dutch famine.
- 47 *Psychoneuroendocrinology.* 2006;31(10):1257-65.
- 48 61. de Rooij SR, Jones A, Phillips DI, Osmond C, Karemaker JM, Roseboom TJ, et al. Prenatal
- 49 Undernutrition and Autonomic Function in Adulthood. *Psychosom Med.* 2016;78(9):991-7.
- 50 62. de Rooij SR, Painter RC, Phillips DI, Osmond C, Tanck MW, Defesche JC, et al. The effects of
- 51 the Pro12Ala polymorphism of the peroxisome proliferator-activated receptor-gamma2 gene on
- 52 glucose/insulin metabolism interact with prenatal exposure to famine. *Diabetes Care.*
- 53 *2006;29(5):1052-7.*
- 54
- 55
- 56
- 57
- 58
- 59
- 60

- 1  
2  
3 63. van Hoek M, Langendonk JG, de Rooij SR, Sijbrands EJ, Roseboom TJ. Genetic variant in the  
4 IGF2BP2 gene may interact with fetal malnutrition to affect glucose metabolism. *Diabetes*.  
5 2009;58(6):1440-4.  
6  
7 64. Botden IP, Zillikens MC, de Rooij SR, Langendonk JG, Danser AH, Sijbrands EJ, et al. Variants in  
8 the SIRT1 gene may affect diabetes risk in interaction with prenatal exposure to famine. *Diabetes*  
9 *Care*. 2012;35(2):424-6.  
10 65. Veenendaal MV, Costello PM, Lillycrop KA, de Rooij SR, van der Post JA, Bossuyt PM, et al.  
11 Prenatal famine exposure, health in later life and promoter methylation of four candidate genes. *J*  
12 *Dev Orig Health Dis*. 2012;3(6):450-7.  
13 66. Lussana F, de Rooij SR, Veenendaal M, Razzari C, Fontana G, Faioni EM, et al. Prevalence of  
14 factor V Leiden and G20210A prothrombin mutation in the Dutch Famine Birth Cohort: a possible  
15 survival advantage? *Thromb Haemost*. 2012;108(2):399-401.  
16 67. de Rooij SR, Painter RC, Phillips DI, Osmond C, Michels RP, Godsland IF, et al. Impaired insulin  
17 secretion after prenatal exposure to the dutch famine. *Diabetes Care*. 2006;29(8):1897-901.  
18 68. de Rooij SR, Painter RC, Phillips DI, Osmond C, Michels RP, Bossuyt PM, et al. Hypothalamic-  
19 pituitary-adrenal axis activity in adults who were prenatally exposed to the Dutch famine.  
20 *EurJEndocrinol*. 2006;155(1):153-60.  
21 69. Carroll D, Ginty AT, Painter RC, Roseboom TJ, Phillips AC, de Rooij SR. Systolic blood pressure  
22 reactions to acute stress are associated with future hypertension status in the Dutch Famine Birth  
23 Cohort Study. *International journal of psychophysiology : official journal of the International*  
24 *Organization of Psychophysiology*. 2012;85(2):270-3.  
25 70. Ginty AT, Carroll D, Roseboom TJ, Phillips AC, de Rooij SR. Depression and anxiety are  
26 associated with a diagnosis of hypertension 5 years later in a cohort of late middle-aged men and  
27 women. *J Hum Hypertens*. 2013;27(3):187-90.  
28 71. de Rooij SR, Veenendaal MV, Raikkonen K, Roseboom TJ. Personality and stress appraisal in  
29 adults prenatally exposed to the Dutch famine. *Early HumDev*. 2011.  
30 72. Veenendaal MV, Painter RC, de Rooij SR, Bossuyt PM, van der Post JA, Gluckman PD, et al.  
31 Transgenerational effects of prenatal exposure to the 1944-45 Dutch famine. *Bjog*. 2013;120(5):548-  
32 53.  
33 73. de Rooij SRC, M.W.A.; Schwaab, D.F.; nederveen, A.J.; Majoie, C.B.; Schwab, M.; Painter, R.C.;  
34 Roseboom, T.J. Prenatal famine exposure has sex-specific effects on brain size. *Brain*. 2016;In press.  
35 74. Franke K, Gaser C, Roseboom TJ, Schwab M, de Rooij SR. Premature brain aging in humans  
36 exposed to maternal nutrient restriction during early gestation. *NeuroImage*. 2018;173:460-71.  
37 75. de Rooij SR, Mutsaerts H, Petr J, Asllani I, Caan MWA, Groot P, et al. Late-life brain perfusion  
38 after prenatal famine exposure. *Neurobiology of aging*. 2019;82:1-9.  
39 76. Bleker LS, de Rooij SR, Painter RC, van der Velde N, Roseboom TJ. Prenatal Undernutrition  
40 and Physical Function and Frailty at the Age of 68 Years: The Dutch Famine Birth Cohort Study. *J*  
41 *Gerontol A Biol Sci Med Sci*. 2016;71(10):1306-14.  
42 77. de Rooij SR, van Pelt AM, Ozanne SE, Korver CM, van Daalen SK, Painter RC, et al. Prenatal  
43 undernutrition and leukocyte telomere length in late adulthood: the Dutch famine birth cohort  
44 study. *Am J Clin Nutr*. 2015;102(3):655-60.  
45 78. van Abeelen AF, Veenendaal MV, Painter RC, de Rooij SR, Dijkgraaf MG, Bossuyt PM, et al.  
46 Survival effects of prenatal famine exposure. *AmJClinNutr*. 2012;95(1):179-83.  
47 79. Gasser B, Mauss Y, Ghnassia JP, Favre R, Kohler M, Yu O, et al. A quantitative study of normal  
48 nephrogenesis in the human fetus: its implication in the natural history of kidney changes due to low  
49 obstructive uropathies. *Fetal Diagn Ther*. 1993;8(6):371-84.  
50 80. Sparrow MP, Weichselbaum M, McCray PB. Development of the innervation and airway  
51 smooth muscle in human fetal lung. *Am J Respir Cell Mol Biol*. 1999;20(4):550-60.  
52 81. Stefan Y, Grasso S, Perrelet A, Orci L. A quantitative immunofluorescent study of the  
53 endocrine cell populations in the developing human pancreas. *Diabetes*. 1983;32(4):293-301.  
54  
55  
56  
57  
58  
59  
60



- 1  
2  
3 82. Roseboom TJ, van der Meulen JHP, Osmond C, Barker DJP, Ravelli ACJ, Bleker OP. Adult  
4 survival after prenatal exposure to the Dutch famine 1944-45. *Paediatric and Perinatal Epidemiology*.  
5 2001;15:220-5.  
6 83. Painter RC, Roseboom TJ, Bossuyt PM, Osmond C, Barker DJ, Bleker OP. Adult mortality at  
7 age 57 after prenatal exposure to the Dutch famine. *Eur J Epidemiol*. 2005;20:673-6.  
8 84. Lumey LH, Stein AD, Kahn HS, van der Pal-de Bruin KM, Blauw GJ, Zybert PA, et al. Cohort  
9 profile: the Dutch Hunger Winter families study. *Int J Epidemiol*. 2007;36(6):1196-204.  
10 85. Susser M, Stein Z. Timing in prenatal nutrition: a reprise of the Dutch Famine Study. *Nutrition*  
11 *Reviews*. 1994;52:84-94.  
12 86. Gluckman PD, Beedle AS, Hanson MA, Yap EP. Developmental perspectives on individual  
13 variation: implications for understanding nutritional needs. *Nestle Nutr Workshop Ser Pediatr*  
14 *Program*. 2008;62:1-9; discussion -12.  
15 87. Hult M, Tornhammar P, Ueda P, Chima C, Bonamy AK, Ozumba B, et al. Hypertension,  
16 diabetes and overweight: looming legacies of the Biafran famine. *PloS one*. 2010;5(10):e13582.  
17 88. Meng R, Lv J, Yu C, Guo Y, Bian Z, Yang L, et al. Prenatal famine exposure, adulthood obesity  
18 patterns and risk of type 2 diabetes. *Int J Epidemiol*. 2018;47(2):399-408.  
19 89. Wang PX, Wang JJ, Lei YX, Xiao L, Luo ZC. Impact of fetal and infant exposure to the Chinese  
20 Great Famine on the risk of hypertension in adulthood. *PloS one*. 2012;7(11):e49720.  
21 90. Xu MQ, Sun WS, Liu BX, Feng GY, Yu L, Yang L, et al. Prenatal malnutrition and adult  
22 schizophrenia: further evidence from the 1959-1961 Chinese famine. *Schizophr Bull*. 2009;35(3):568-  
23 76.  
24 91. Thurner S, Klimek P, Szell M, Duftschmid G, Endel G, Kautzky-Willer A, et al. Quantification of  
25 excess risk for diabetes for those born in times of hunger, in an entire population of a nation, across a  
26 century. *Proc Natl Acad Sci U S A*. 2013;110(12):4703-7.  
27 92. Lumey LH, Khalangot MD, Vaiserman AM. Association between type 2 diabetes and prenatal  
28 exposure to the Ukraine famine of 1932-33: a retrospective cohort study. *Lancet Diabetes*  
29 *Endocrinol*. 2015;3(10):787-94.  
30  
31  
32  
33  
34  
35  
36  
37  
38  
39  
40  
41  
42  
43  
44  
45  
46  
47  
48  
49  
50  
51  
52  
53  
54  
55  
56  
57  
58  
59  
60

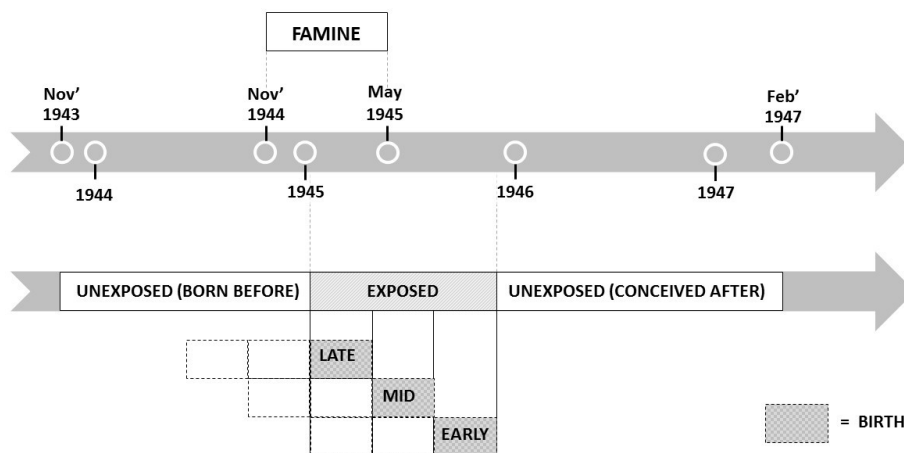

Figure 1. Dutch famine birth cohort schematic presentation of gestational famine exposure.

338x190mm (96 x 96 DPI)



1  
2  
3  
4  
5  
6  
7  
8  
9  
10  
11  
12  
13  
14  
15  
16  
17  
18  
19  
20  
21  
22  
23  
24  
25  
26  
27  
28  
29  
30  
31  
32  
33  
34  
35  
36  
37  
38  
39  
40  
41  
42  
43  
44  
45  
46  
47  
48  
49  
50  
51  
52  
53  
54  
55  
56  
57  
58  
59  
60

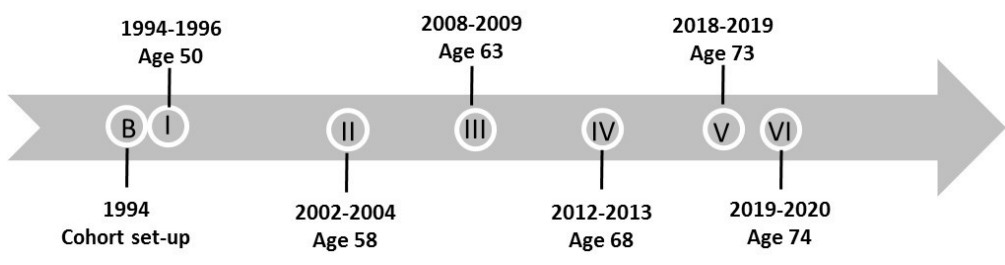

Figure 2. Dutch famine birth cohort schematic presentation of study waves.  
214x56mm (120 x 120 DPI)
